# Supplementary material for: Enhanced antibacterial activity of new “composite” biocides with both N-chloramine and quaternary ammonium moieties
Source: Royal Society of Chemistry journal article supplement (doi:10.1039/c5ra15714e), 2015-01-01
Supplement: c5ra15714e1.pdf [file c5ra15714e1.pdf]

## Supporting Information

### **Superior-Enhanced Antibacterial Activity of New “Composite” Biocides with both *N*-chloramine and Quaternary Ammonium Moieties**

Chenxi Ning<sup>‡,1</sup> Lingdong Li<sup>‡,2</sup> Sarvesh Logsetty,<sup>3</sup> Sadegh Ghanbar,<sup>4</sup> Melinda Guo,<sup>5</sup> Werner  
Ens,<sup>6</sup> and Song Liu<sup>\*,1,4,7,8</sup>

\*Correspondence: Song Liu, Department of Textile Sciences, Faculty of Human Ecology;  
Department of Biosystems Engineering, Faculty of Engineering, University of Manitoba,  
Winnipeg, Canada R3T 2N2, 204-474-9616 (phone); 204-474-7593 (fax);  
[Song.Liu@umanitoba.ca](mailto:Song.Liu@umanitoba.ca)

#### Table of Contents

|                                                                                                                                                                                                                                                                                   | <u>page</u> |
|-----------------------------------------------------------------------------------------------------------------------------------------------------------------------------------------------------------------------------------------------------------------------------------|-------------|
| 1. <sup>1</sup> H and <sup>13</sup> C NMR of compounds # <b>1-3, 5-9</b> and <b>10-12</b> .....                                                                                                                                                                                   | S2          |
| 2. HPLC-MS analysis of compounds # <b>1-3,7-9</b> .....                                                                                                                                                                                                                           | S26         |
| 3. Absolute quantitative <sup>1</sup> H NMR (qHNMR) of compounds# <b>4-6,10-12</b> .....                                                                                                                                                                                          | S32         |
| 4. <u>Comparison of the antibacterial activity of compounds#9 and 12 with Benzyl-dodecyl-dimethyl-ammonium bromide (C12) and Benzyl-tetradecyl-dimethyl-ammonium chloride(C14) against 10<sup>7</sup> CFU/mL of MRSA and 10<sup>6</sup> CFU/mL MDR <i>P.aeruginosas</i> .....</u> | <u>S45</u>  |

1. <sup>1</sup>H and <sup>13</sup>C NMR of compounds # 1-3, 5-9 and 10-12

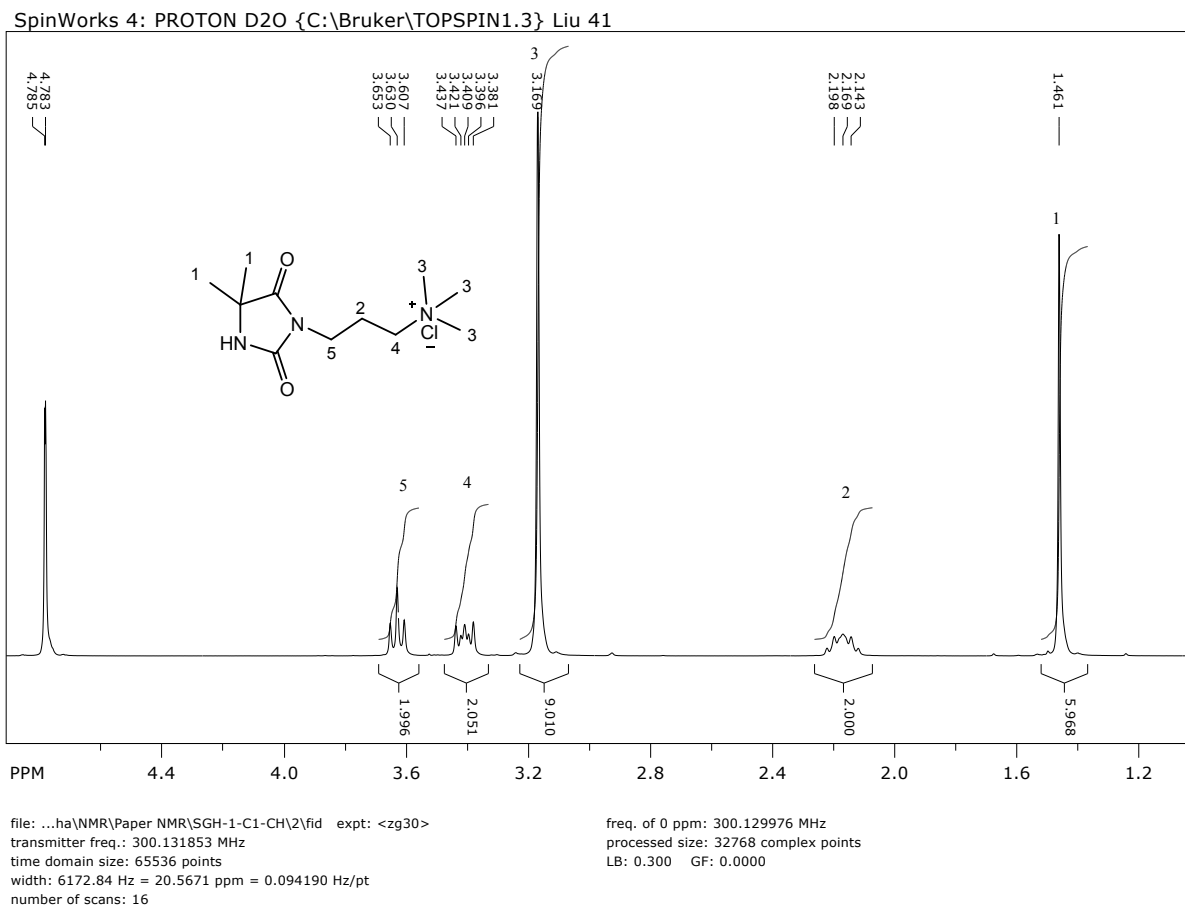

Figure S1. <sup>1</sup>H-NMR spectrum of compound#1 (D<sub>2</sub>O).

SpinWorks 4: C13CPD D2O {C:\Bruker\TOPSPIN1.3} Liu 41

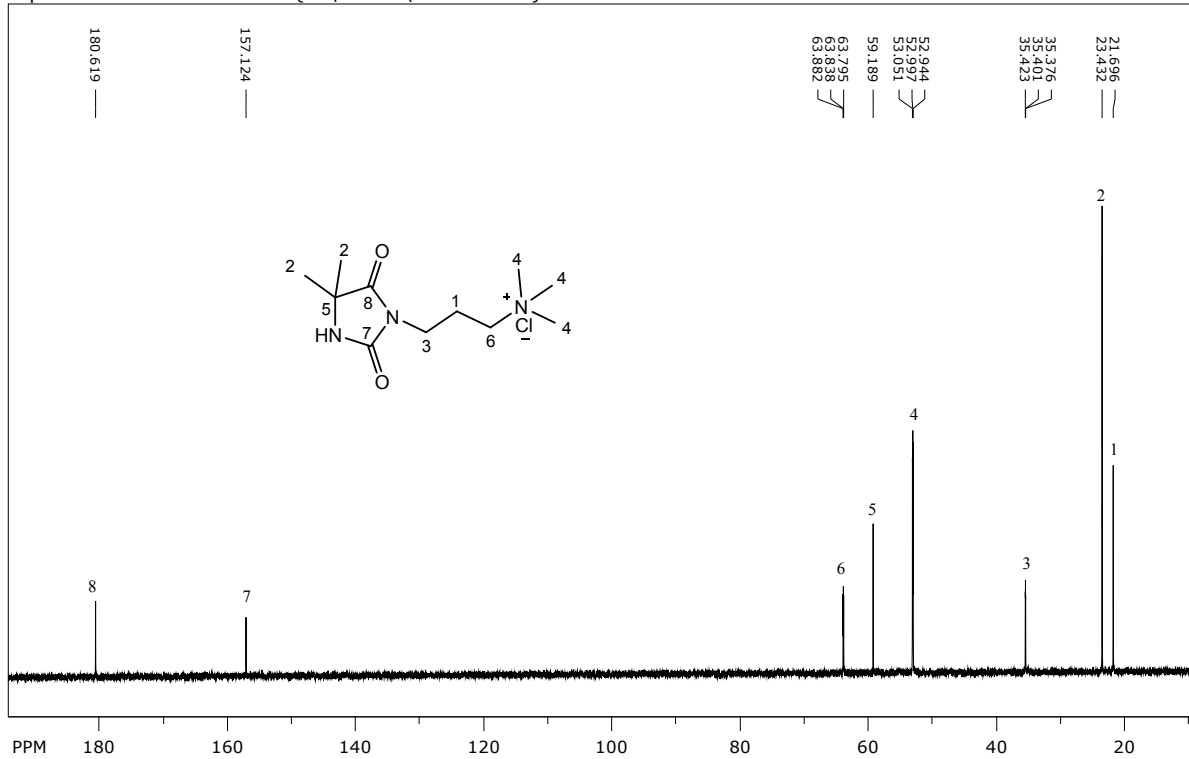

file: ...ha\NMR\Paper NMR\SGH-1-C1-CH\1\fid expt: <zpgp30>  
transmitter freq.: 75.475295 MHz  
time domain size: 65536 points  
width: 17985.61 Hz = 238.2980 ppm = 0.274439 Hz/pt  
number of scans: 1024

freq. of 0 ppm: 75.467749 MHz  
processed size: 32768 complex points  
LB: 1.000 GF: 0.0000

**Figure S2.** <sup>13</sup>C NMR spectrum of **compound#1** (D<sub>2</sub>O).

SpinWorks 4: SL-48-1

PROTON D2O {C:\Bruker\TOPSPIN1.3} student 58

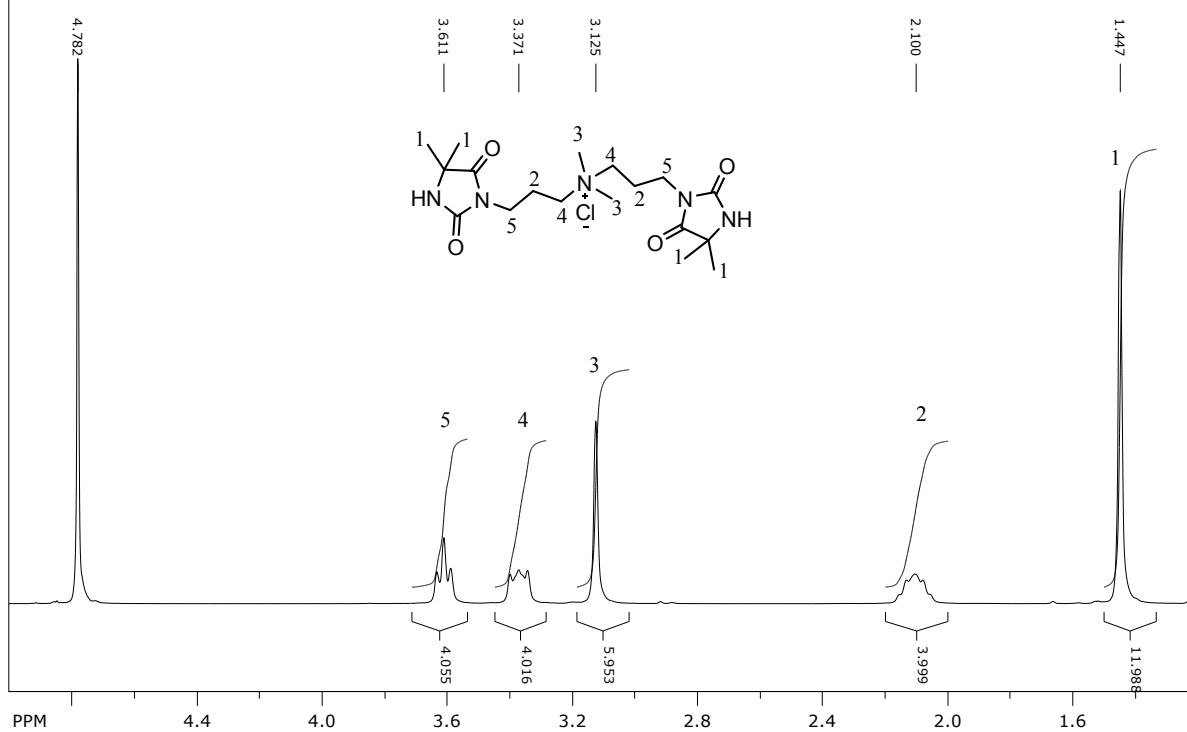

file: ...data in W512\textile-SL-48-1\1\fid exp: <zg30>  
transmitter freq.: 300.131853 MHz  
time domain size: 65536 points  
width: 6172.84 Hz = 20.5671 ppm = 0.094190 Hz/pt  
number of scans: 16

freq. of 0 ppm: 300.129976 MHz  
processed size: 32768 complex points  
LB: 0.300 GF: 0.0000

**Figure S3.** <sup>1</sup>H-NMR spectrum of **compound#2** (D<sub>2</sub>O).

SpinWorks 4: C13CPD D2O {C:\Bruker\TOPSPIN1.3} Liu 42

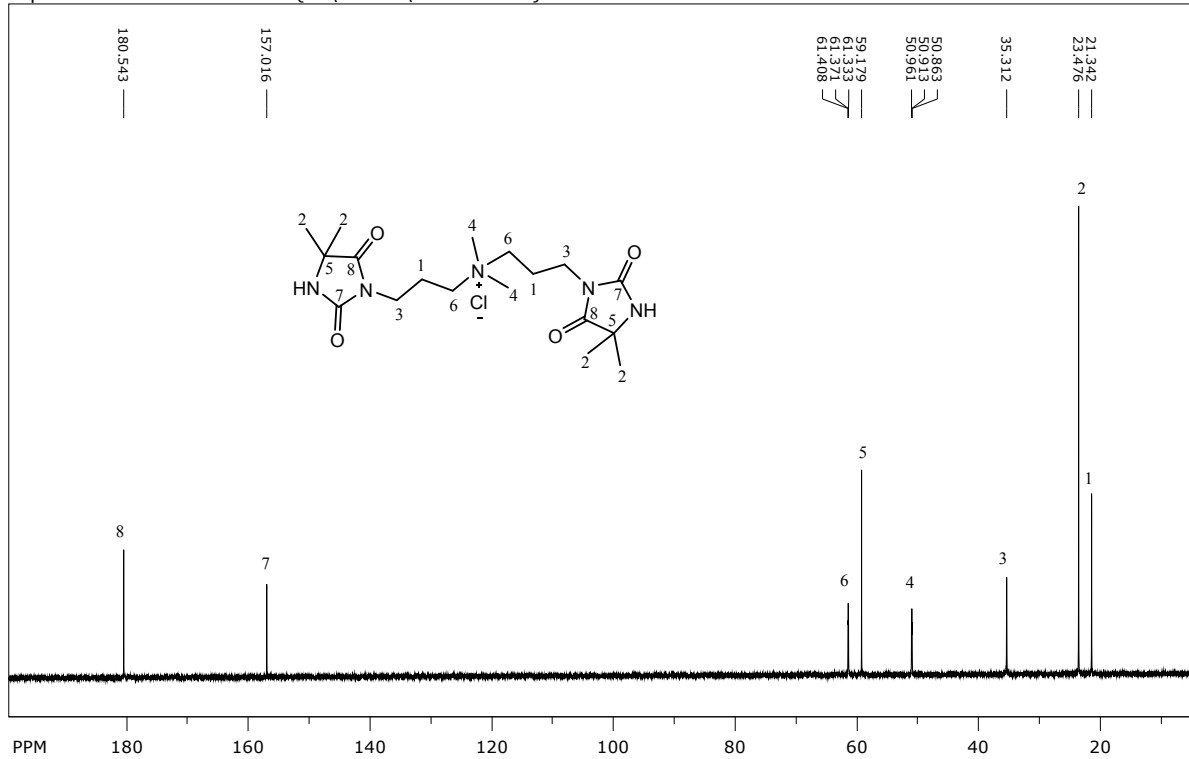

file: ...ha\NMR\Paper NMR\SGH-1-C2-CH\1\fid expt: <zpgg30>  
transmitter freq.: 75.475295 MHz  
time domain size: 65536 points  
width: 17985.61 Hz = 238.2980 ppm = 0.274439 Hz/pt  
number of scans: 1024

freq. of 0 ppm: 75.467749 MHz  
processed size: 32768 complex points  
LB: 1.000 GF: 0.0000

**Figure S4.** <sup>13</sup>C NMR spectrum of **compound#2** (D<sub>2</sub>O).

SpinWorks 4: PROTON D2O {C:\Bruker\TOPSPIN1.3} Liu 43

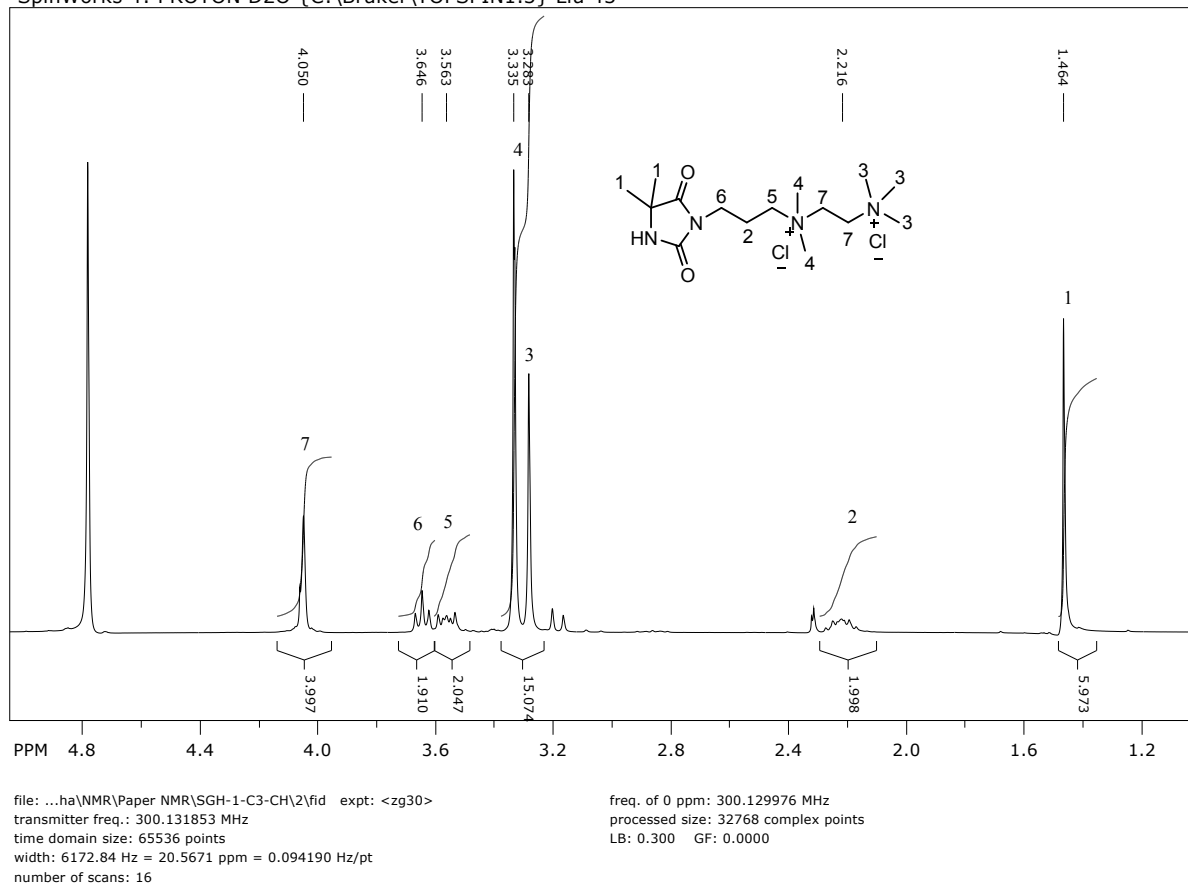

Figure S5. <sup>1</sup>H-NMR spectrum of **compound#3** (D<sub>2</sub>O).

SpinWorks 4: C13CPD D2O {C:\Bruker\TOPSPIN1.3} Liu 43

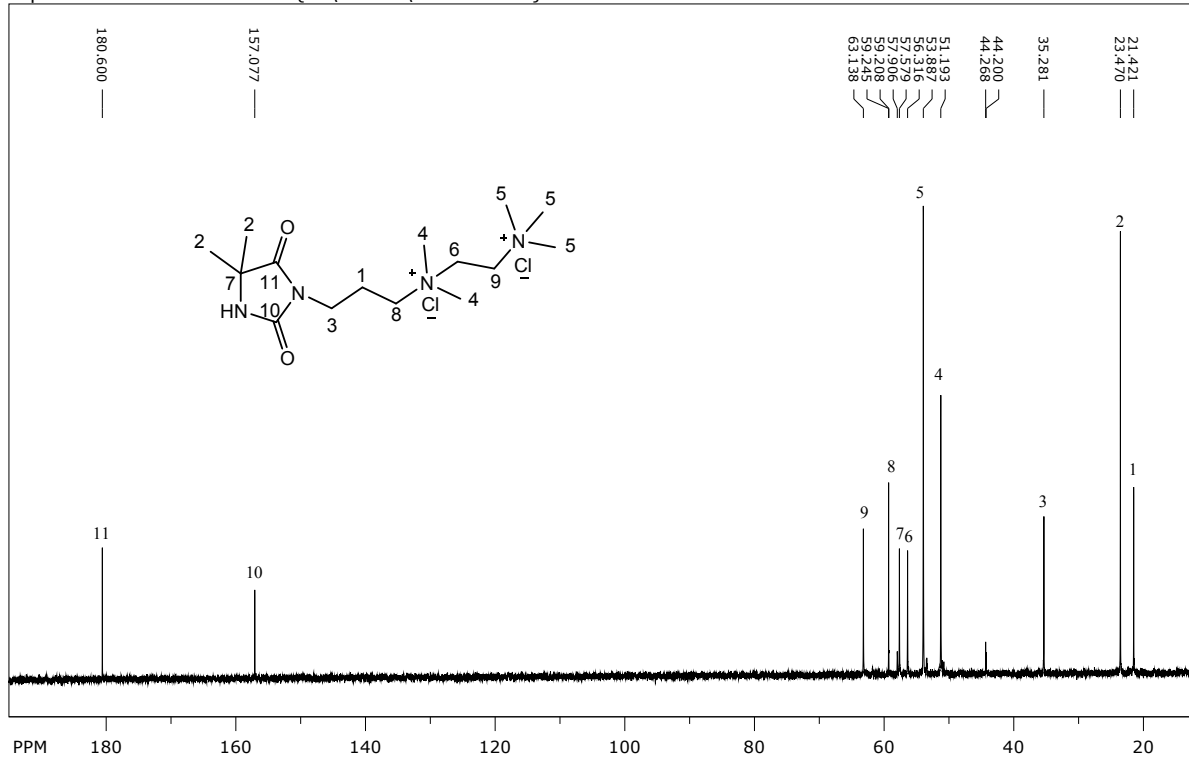

file: ...ha\NMR\Paper NMR\SGH-1-C3-CH\1\fid expt: <zpgg30>  
transmitter freq.: 75.475295 MHz  
time domain size: 65536 points  
width: 17985.61 Hz = 238.2980 ppm = 0.274439 Hz/pt  
number of scans: 1024

freq. of 0 ppm: 75.467749 MHz  
processed size: 32768 complex points  
LB: 1.000 GF: 0.0000

**Figure S6.**  $^{13}\text{C}$  NMR spectrum of **compound#3** ( $\text{D}_2\text{O}$ ).

SpinWorks 4: PROTON D2O {C:\Bruker\TOPSPIN1.3} Liu 23

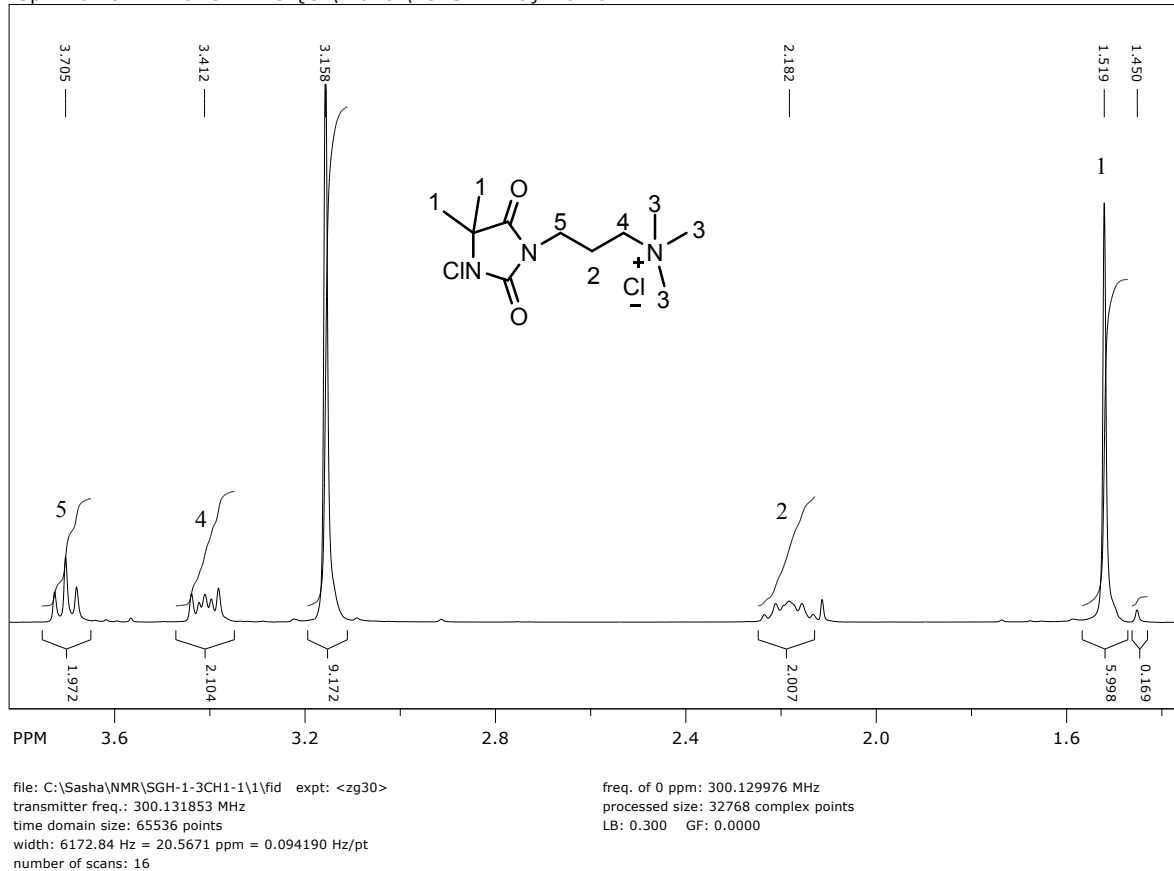

Figure S7.  $^1\text{H}$ -NMR spectrum of **compound#4** ( $\text{D}_2\text{O}$ ).



SpinWorks 4: C13CPD D2O {C:\Bruker\TOPSPIN1.3} Liu 44

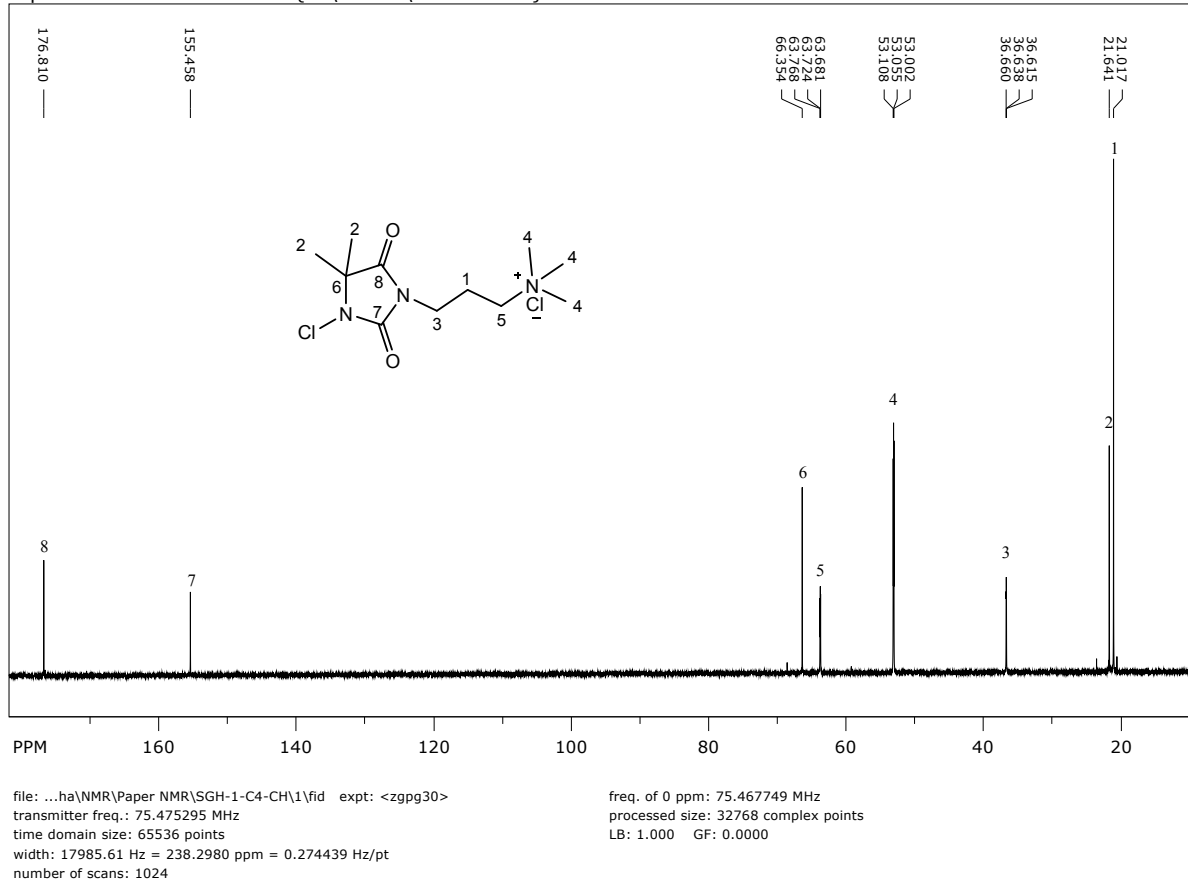

**Figure S8.** <sup>13</sup>C NMR spectrum of **compound#4** (D<sub>2</sub>O).

SpinWorks 4: PROTON D2O {C:\Bruker\TOPSPIN1.3} Liu 24

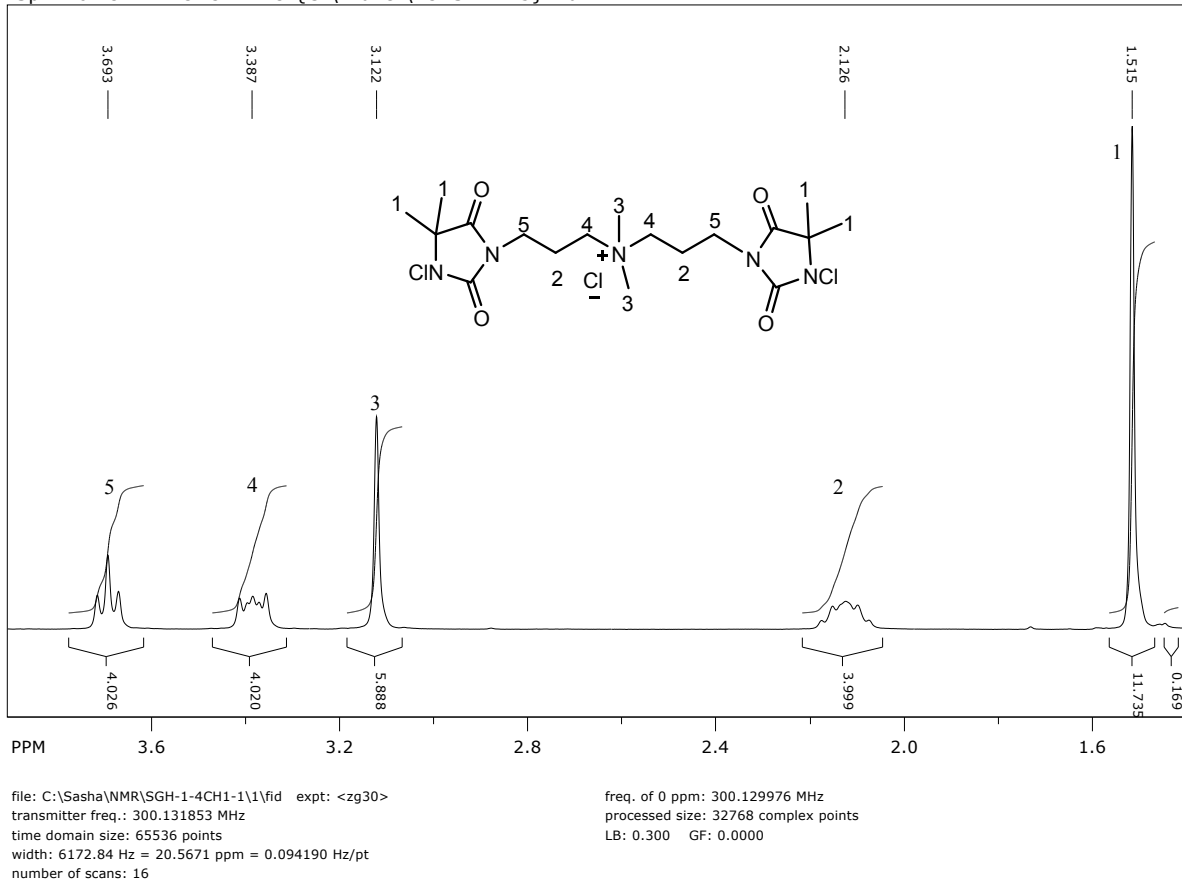

Figure S9. <sup>1</sup>H-NMR spectrum of compound#5 (D<sub>2</sub>O).

SpinWorks 4: SL-77-2

C13CPD256 D2O {C:\Bruker\TOPSPIN1.3} student 48

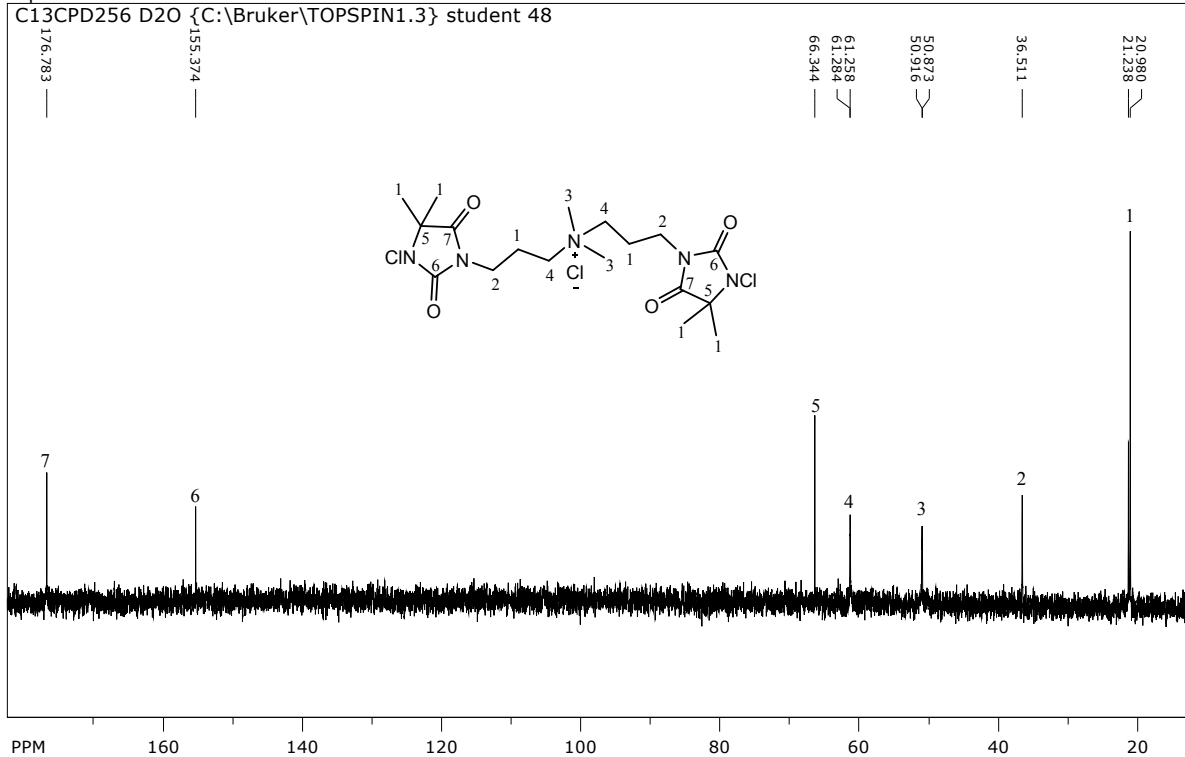

file: ...data in W512\Textile-SL-77-2\2\fid expt: <zpgp30>  
transmitter freq.: 75.475295 MHz  
time domain size: 65536 points  
width: 17985.61 Hz = 238.2980 ppm = 0.274439 Hz/pt  
number of scans: 256

freq. of 0 ppm: 75.467749 MHz  
processed size: 32768 complex points  
LB: 1.000 GF: 0.0000

**Figure S10.**  $^{13}\text{C}$  NMR spectrum of compound#5 ( $\text{D}_2\text{O}$ ).

SpinWorks 4: PROTON D2O {C:\Bruker\TOPSPIN1.3} Liu 21

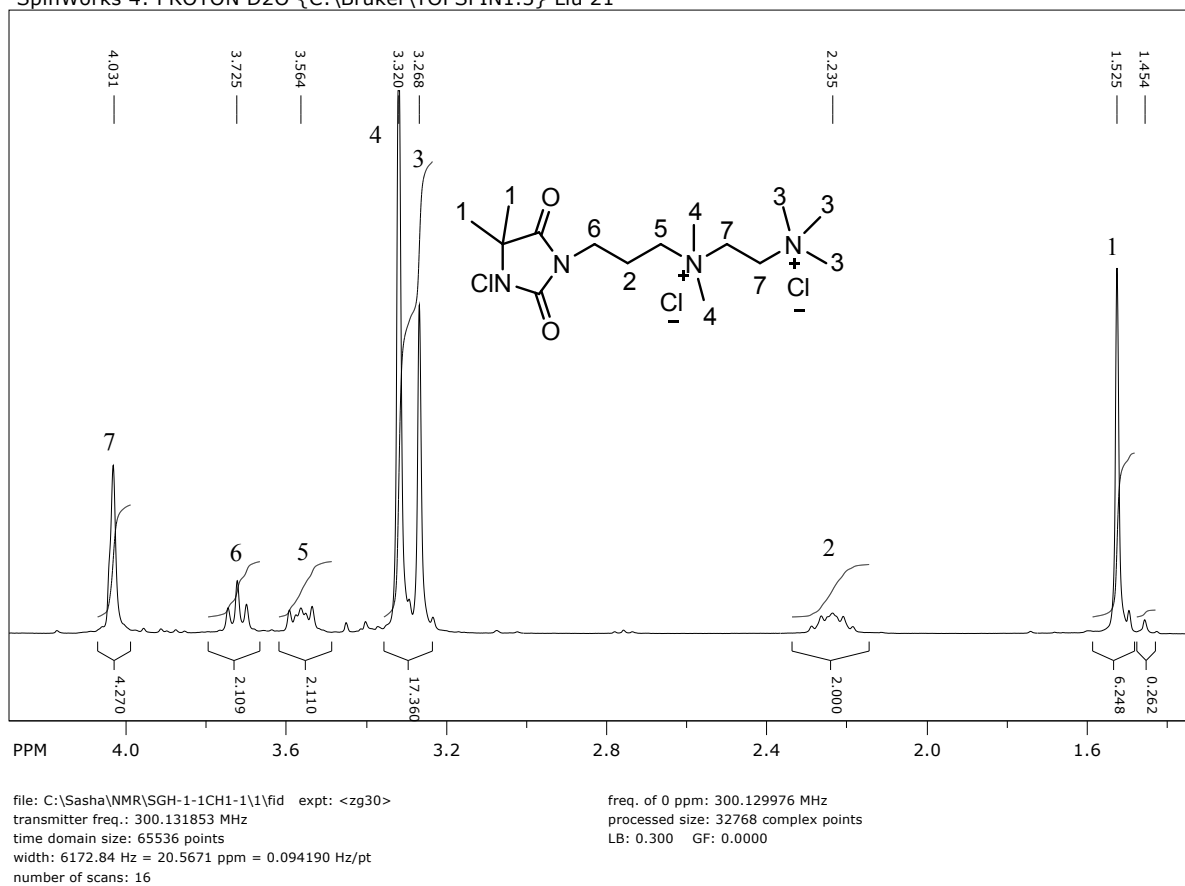

**Figure S11.**  $^1\text{H-NMR}$  spectrum of **compound#6** ( $\text{D}_2\text{O}$ ).

SpinWorks 4: C13CPD D2O {C:\Bruker\TOPSPIN1.3} Liu 46

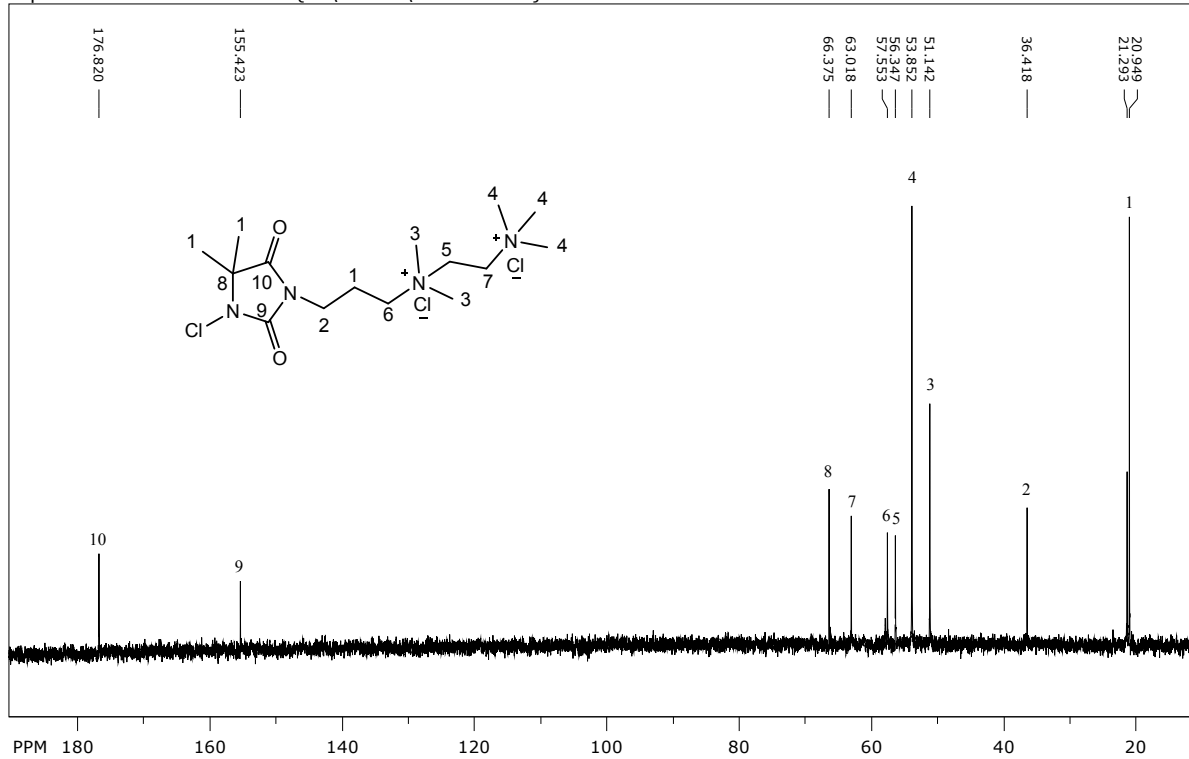

file: ...ha\NMR\Paper NMR\SGH-1-C6-CH\1\fid expt: <zpgg30>  
transmitter freq.: 75.475295 MHz  
time domain size: 65536 points  
width: 17985.61 Hz = 238.2980 ppm = 0.274439 Hz/pt  
number of scans: 1024

freq. of 0 ppm: 75.467749 MHz  
processed size: 32768 complex points  
LB: 1.000 GF: 0.0000

**Figure S12.** <sup>13</sup>C NMR spectrum of compound#6 (D<sub>2</sub>O).

SpinWorks 4: SL-135-1

PROTON D2O {C:\Bruker\TOPSPIN1.3} student 376

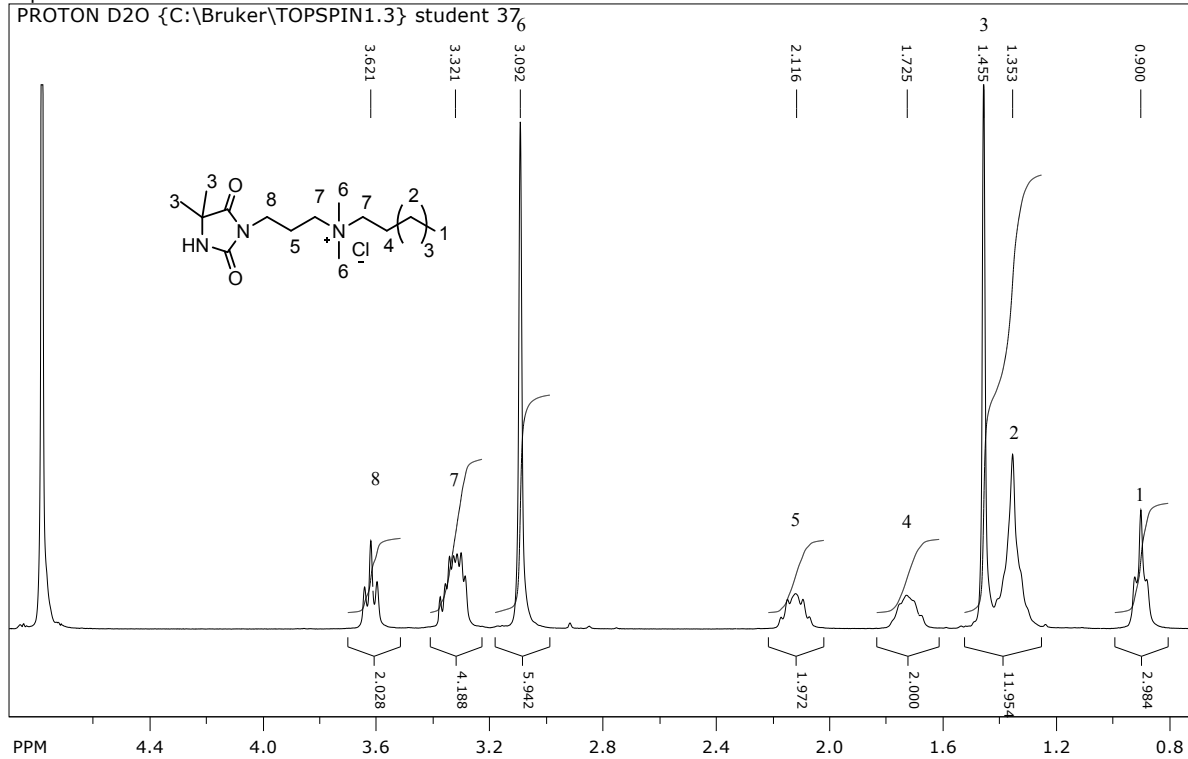

file: ...ata in W512\textile-SL-135-1\1\fid expt: <zg30>  
transmitter freq.: 300.131853 MHz  
time domain size: 65536 points  
width: 6172.84 Hz = 20.5671 ppm = 0.094190 Hz/pt  
number of scans: 16

freq. of 0 ppm: 300.129976 MHz  
processed size: 32768 complex points  
LB: 0.300 GF: 0.0000

**Figure S13.** <sup>1</sup>H-NMR spectrum of **compound#7** (D<sub>2</sub>O).

SpinWorks 4: SL-135-3

C13CPD256 D2O {C:\Bruker\TOPSPIN1.3} student 56

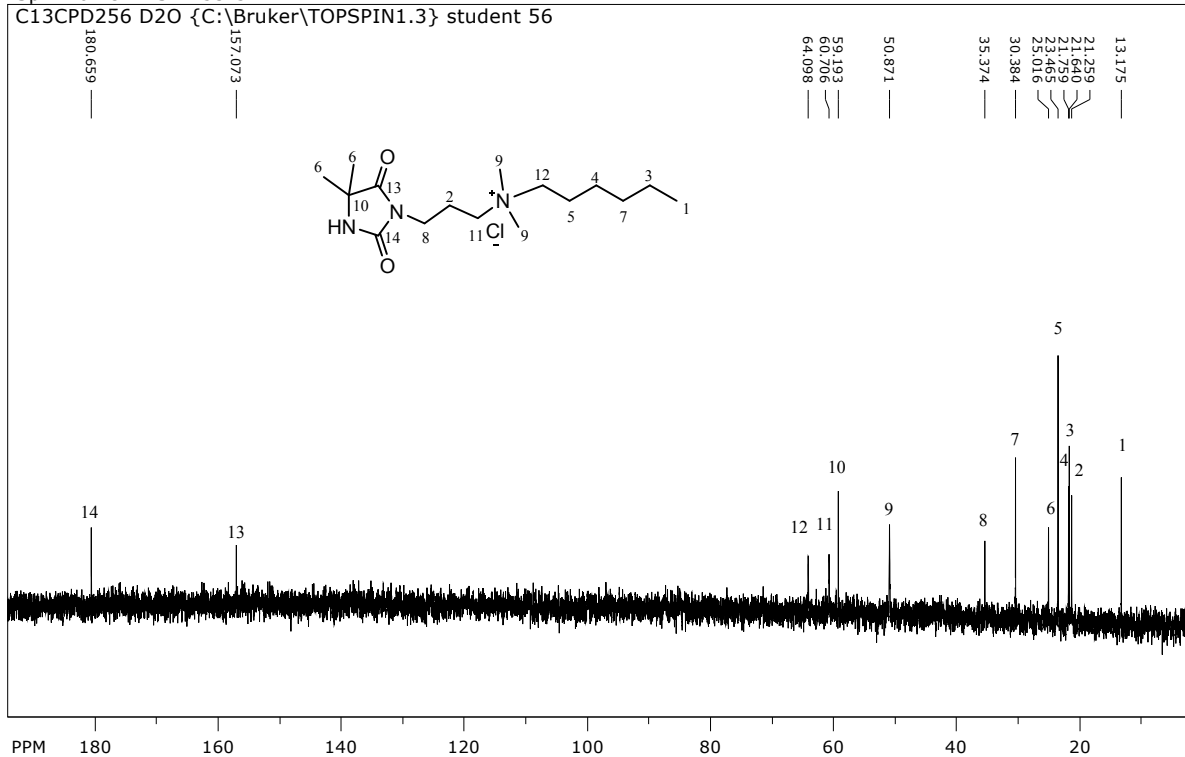

file: ...R data in W512\textile-135-3\1\fid expt: <zggg30>  
transmitter freq.: 75.475295 MHz  
time domain size: 65536 points  
width: 17985.61 Hz = 238.2980 ppm = 0.274439 Hz/pt  
number of scans: 256

freq. of 0 ppm: 75.467749 MHz  
processed size: 32768 complex points  
LB: 1.000 GF: 0.0000

**Figure S14.**  $^{13}\text{C}$  NMR spectrum of compound#7 ( $\text{D}_2\text{O}$ ).

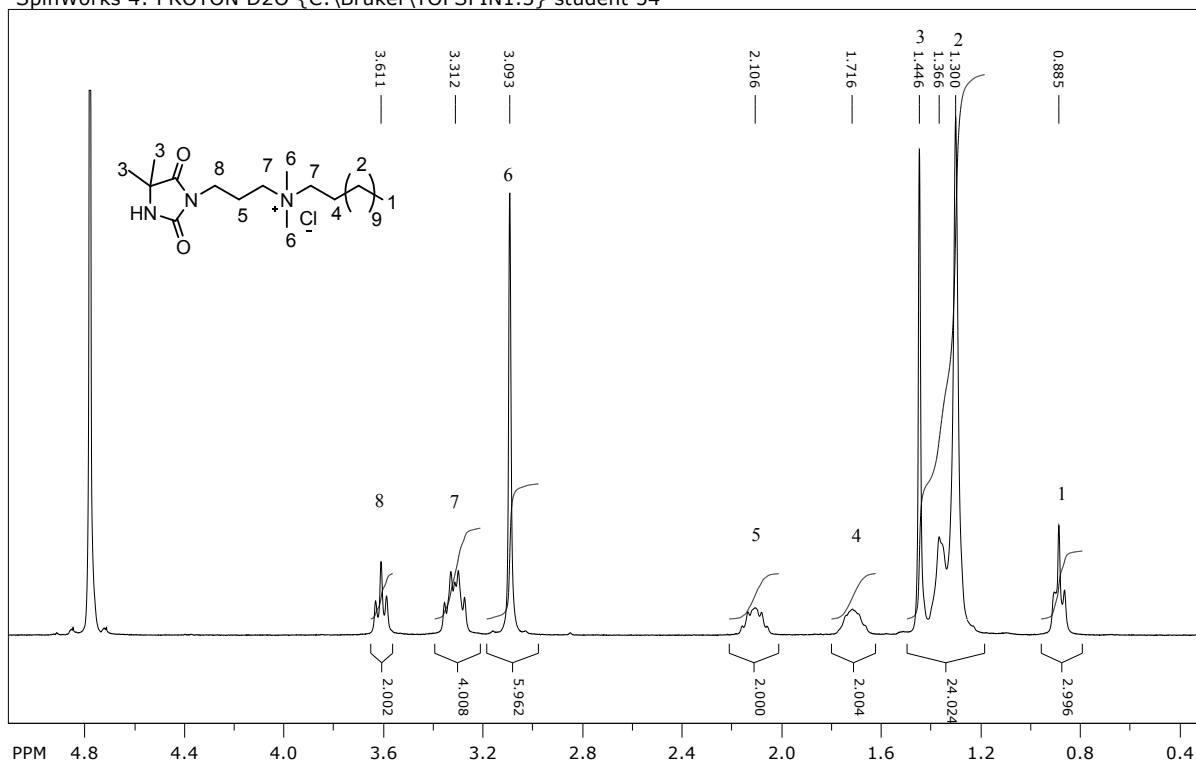

file: ...a\NMR data in W512\sgH-138-4\1\fid exp: <zg30>  
transmitter freq.: 300.131853 MHz  
time domain size: 65536 points  
width: 6172.84 Hz = 20.5671 ppm = 0.094190 Hz/pt  
number of scans: 16

freq. of 0 ppm: 300.129976 MHz  
processed size: 32768 complex points  
LB: 0.300 GF: 0.0000

**Figure S15.**  $^1\text{H}$ -NMR spectrum of **compound#8** ( $\text{D}_2\text{O}$ ).



SpinWorks 4: C13CPD D2O {C:\Bruker\TOPSPIN1.3} Liu 48

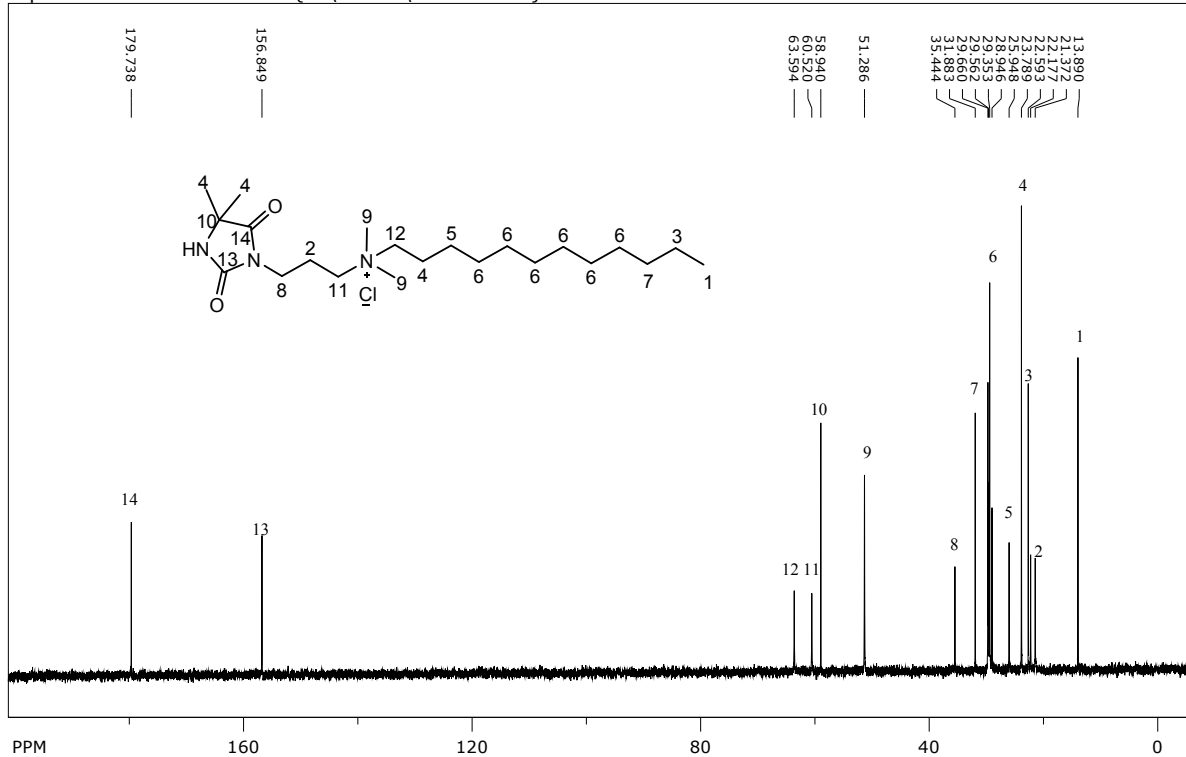

file: ...ha\NMR\Paper NMR\SGH-1-C8-CH\1\fid expt: <zgpg30>  
transmitter freq.: 75.475295 MHz  
time domain size: 65536 points  
width: 17985.61 Hz = 238.2980 ppm = 0.274439 Hz/pt  
number of scans: 1024

freq. of 0 ppm: 75.467749 MHz  
processed size: 32768 complex points  
LB: 1.000 GF: 0.0000

**Figure S16.**  $^{13}\text{C}$  NMR spectrum of **compound#8** ( $\text{D}_2\text{O}$ ).

SpinWorks 4: PROTON D2O {C:\Bruker\TOPSPIN1.3} Liu 47

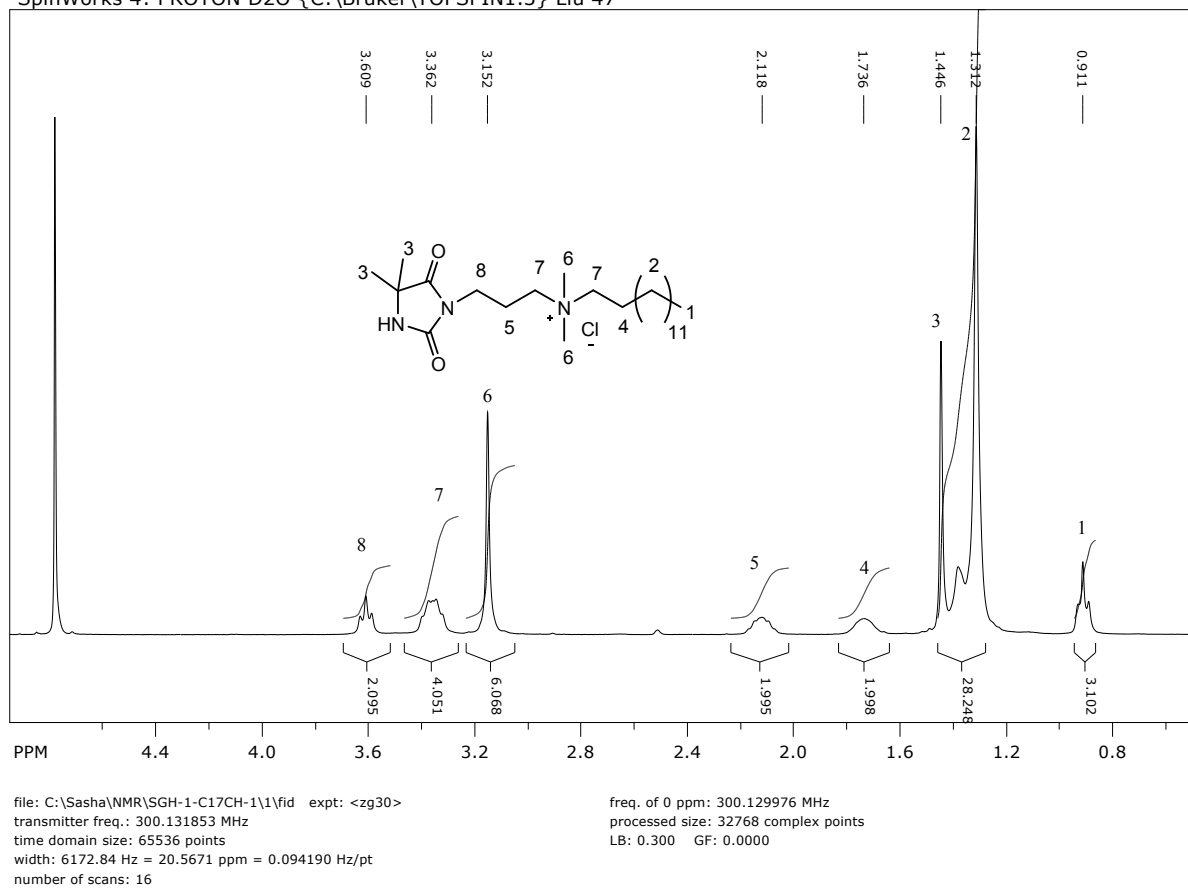

**Figure S17.**  $^1\text{H}$ -NMR spectrum of **compound#9** ( $\text{D}_2\text{O}$ ).

SpinWorks 4: C13CPD D2O {C:\Bruker\TOPSPIN1.3} Liu 49

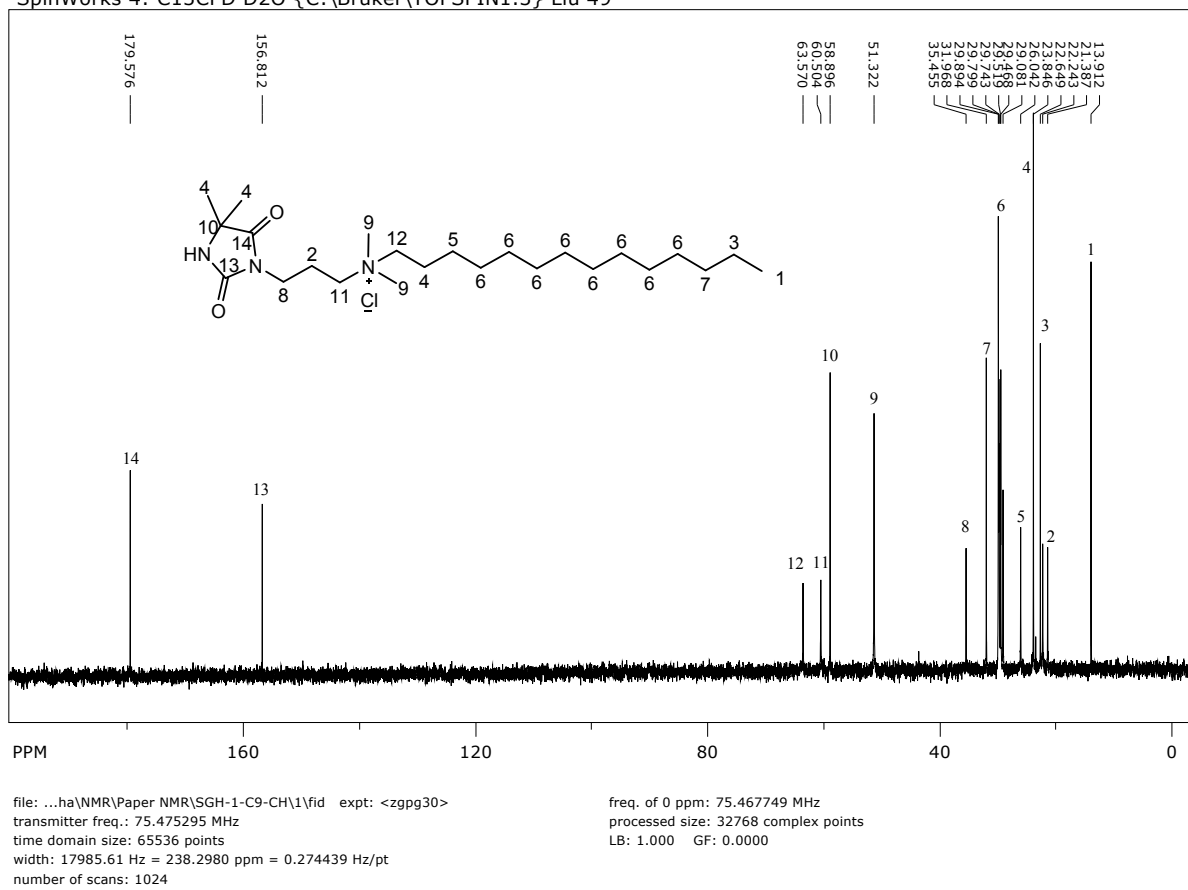

**Figure S18.**  $^{13}\text{C}$  NMR spectrum of **compound#9** ( $\text{D}_2\text{O}$ ).

SpinWorks 4: PROTON D2O {C:\Bruker\TOPSPIN1.3} Liu 22

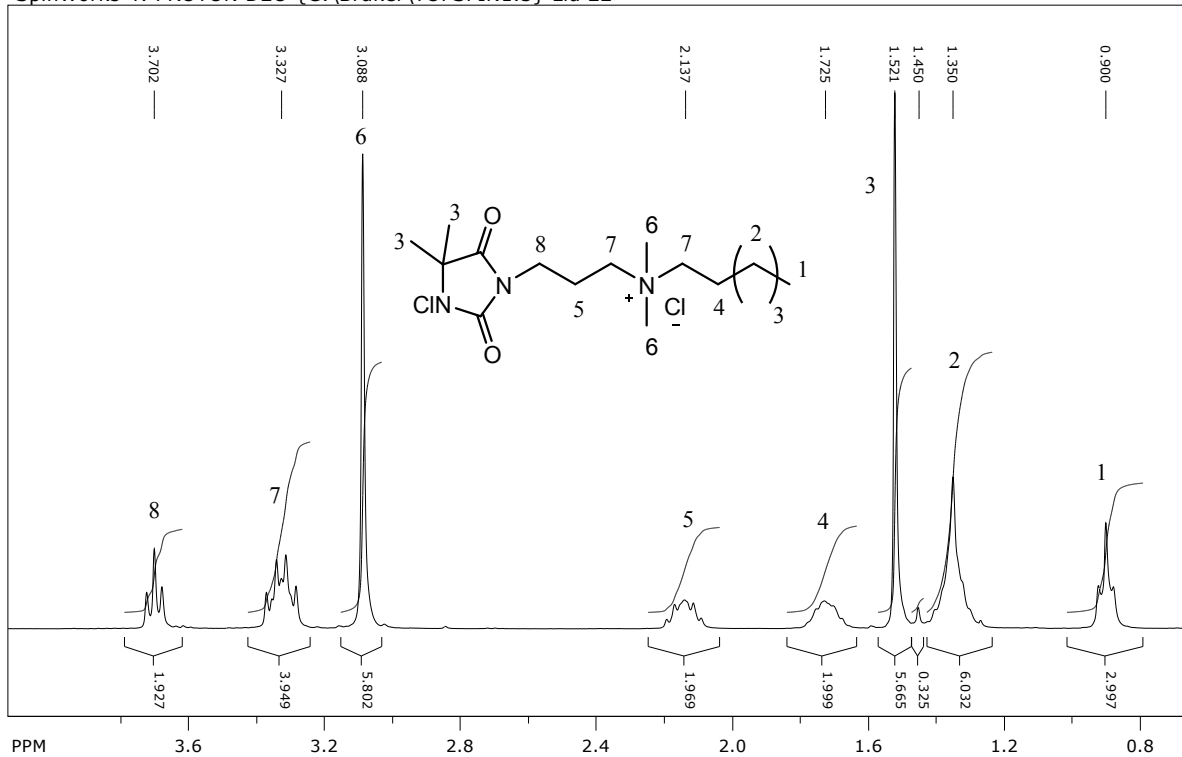

file: C:\Sasha\NMR\SGH-1-2CH1-1\1\fid exp: <zg30>  
transmitter freq.: 300.131853 MHz  
time domain size: 65536 points  
width: 6172.84 Hz = 20.5671 ppm = 0.094190 Hz/pt  
number of scans: 16

freq. of 0 ppm: 300.129976 MHz  
processed size: 32768 complex points  
LB: 0.300 GF: 0.0000

**Figure S19.** <sup>1</sup>H-NMR spectrum of **compound#10** (D<sub>2</sub>O).

SpinWorks 4: C13CPD D2O {C:\Bruker\TOPSPIN1.3} Liu 40

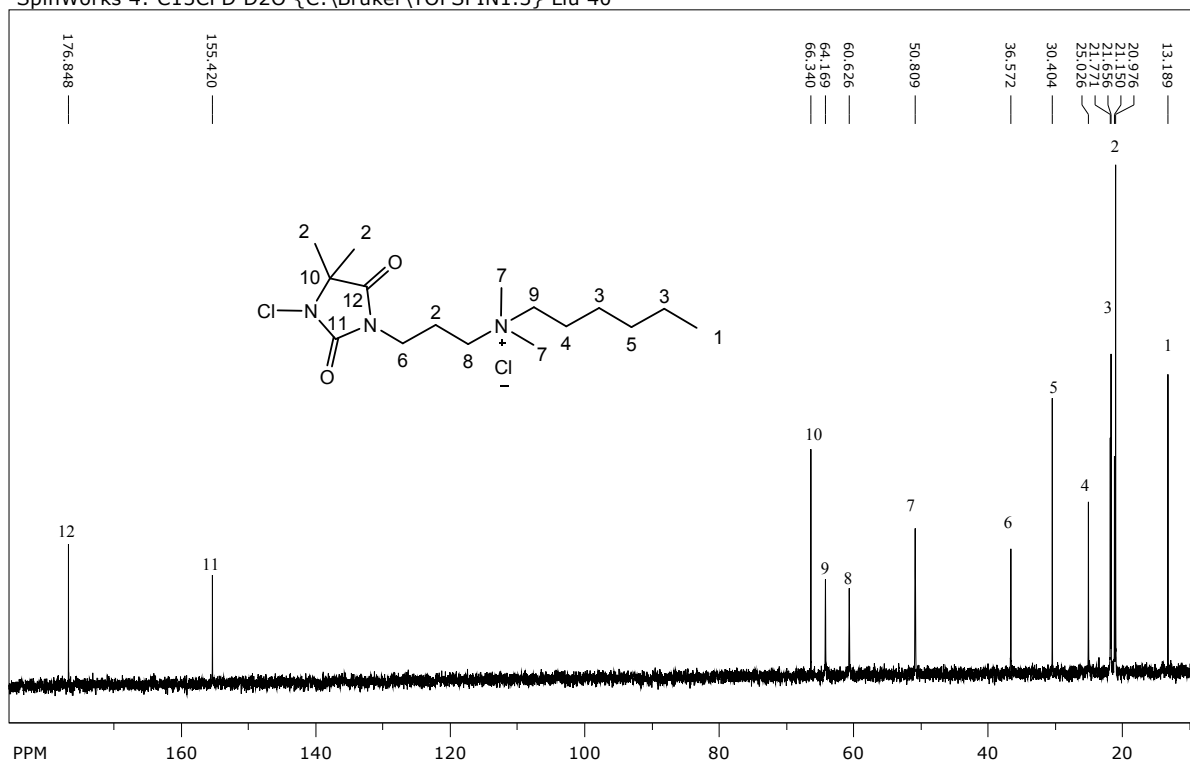

file: ...a\NMR\Paper NMR\SGH-1-C10-CH\1\fid exp: <zpgp30>  
transmitter freq.: 75.475295 MHz  
time domain size: 65536 points  
width: 17985.61 Hz = 238.2980 ppm = 0.274439 Hz/pt  
number of scans: 1024

freq. of 0 ppm: 75.467749 MHz  
processed size: 32768 complex points  
LB: 1.000 GF: 0.0000

**Figure S20.** <sup>13</sup>C NMR spectrum of **compound#10** (D<sub>2</sub>O).

SpinWorks 4: PROTON D2O {C:\Bruker\TOPSPIN1.3} Liu 48

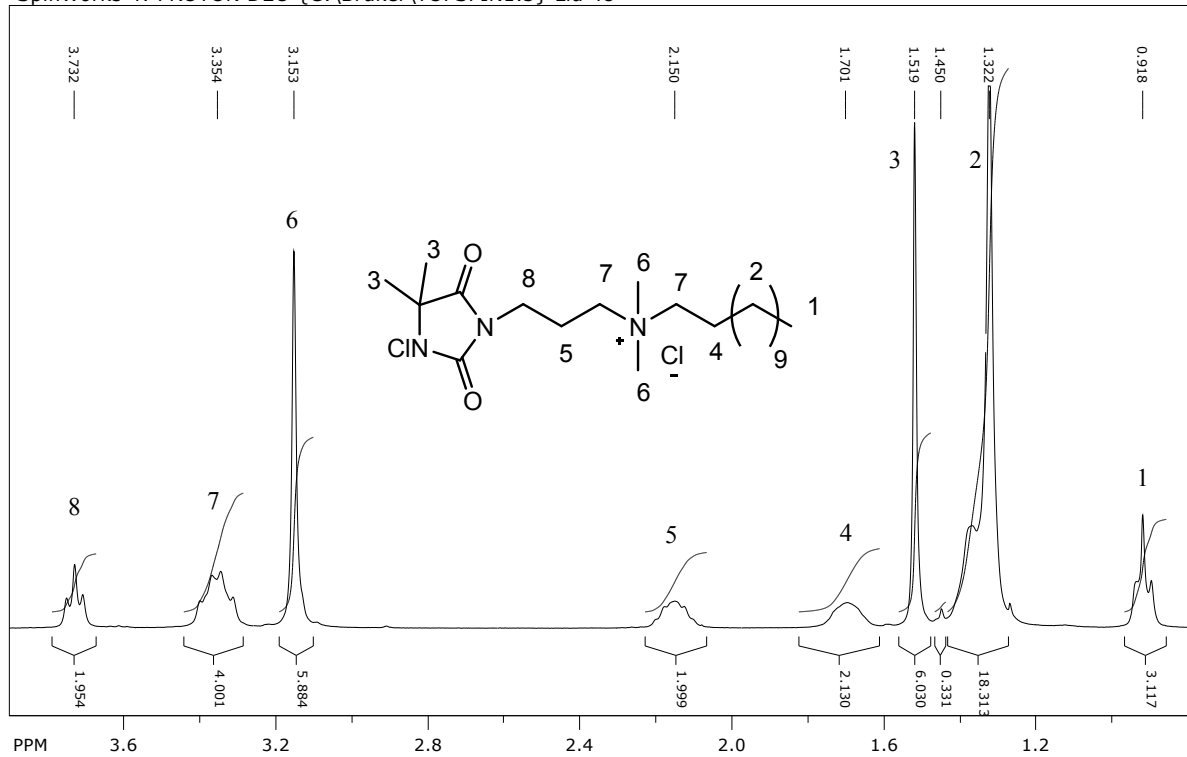

file: C:\Sasha\NMR\SGH-1-176-2\1\fid exp: <zg30>  
transmitter freq.: 300.131853 MHz  
time domain size: 65536 points  
width: 6172.84 Hz = 20.5671 ppm = 0.094190 Hz/pt  
number of scans: 16

freq. of 0 ppm: 300.129976 MHz  
processed size: 32768 complex points  
LB: 0.300 GF: 0.0000

**Figure S21.** <sup>1</sup>H-NMR spectrum of **compound#11**(D<sub>2</sub>O).

SpinWorks 4: C13CPD D2O {C:\Bruker\TOPSPIN1.3} Liu 47

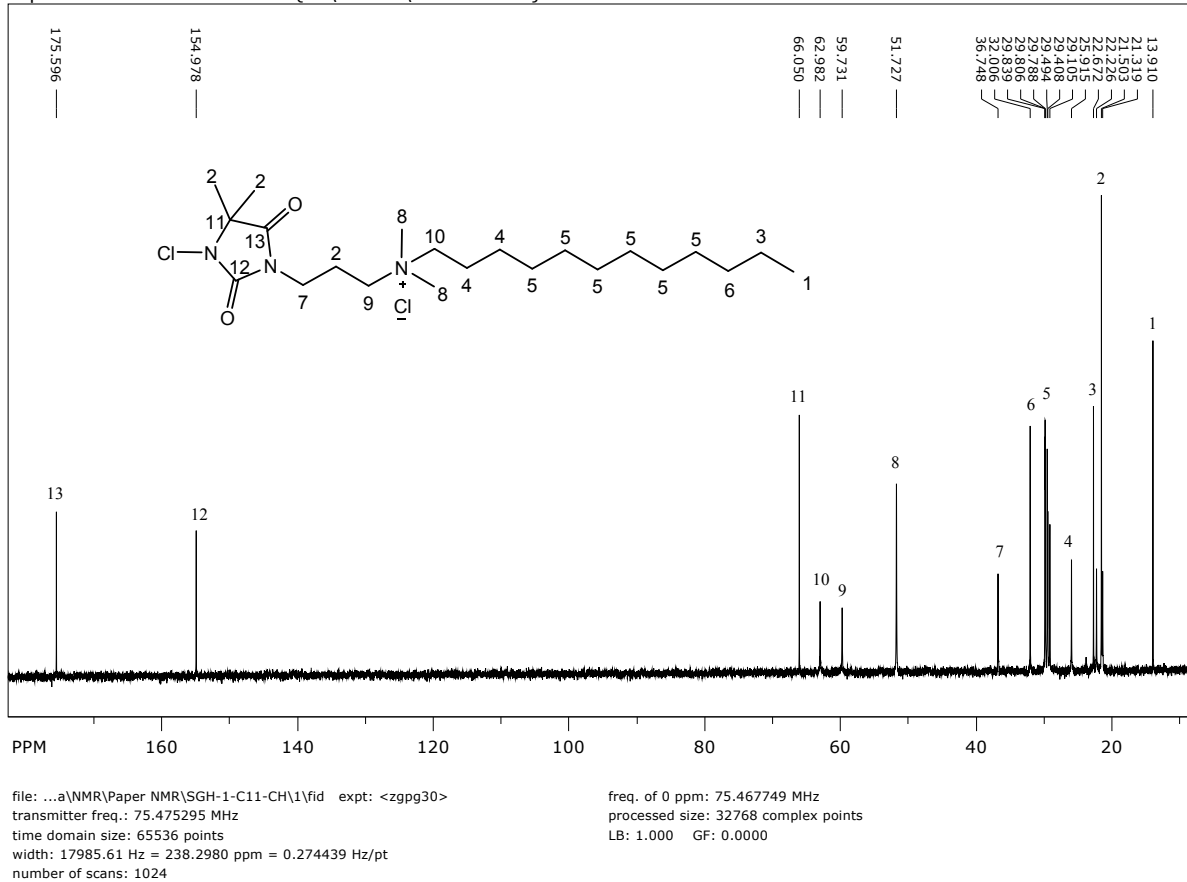

**Figure S22.**  $^{13}\text{C}$  NMR spectrum of **compound#11**( $\text{D}_2\text{O}$ ).

SpinWorks 4: PROTON D2O {C:\Bruker\TOPSPIN1.3} Liu 20

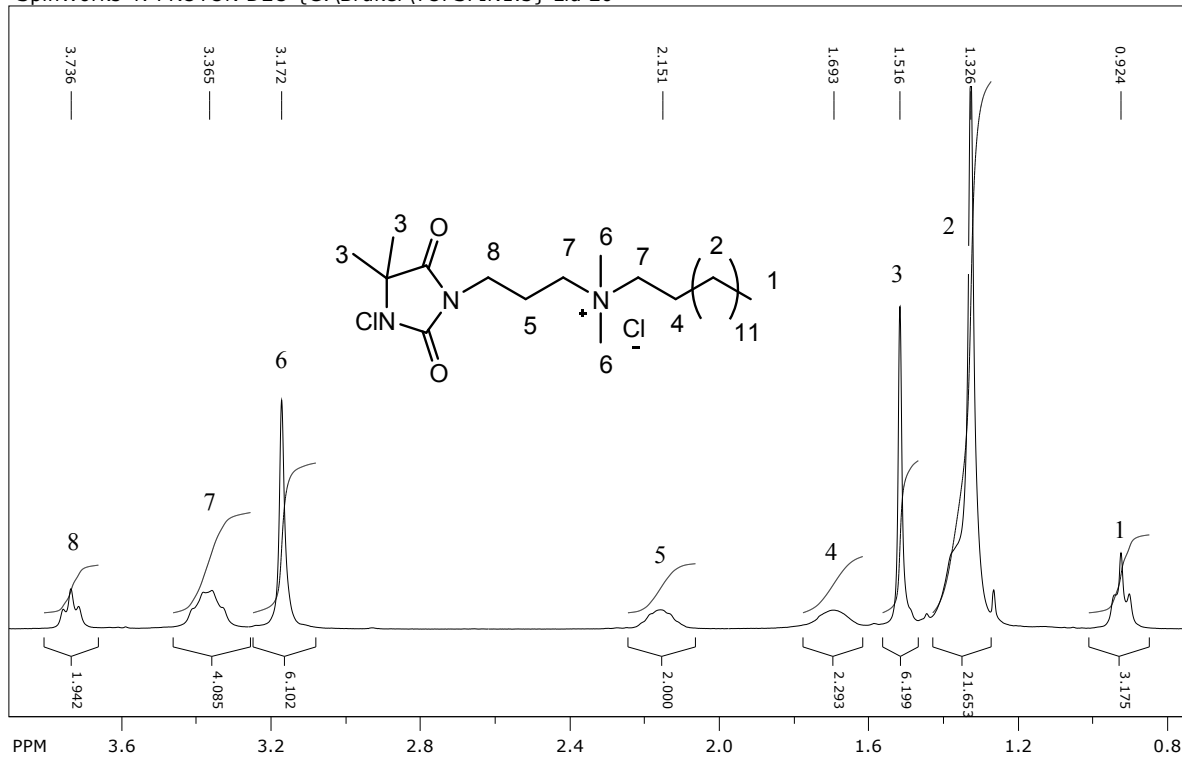

file: C:\Sasha\NMR\SGH-1-151-7\1\fid expt: <zg30>  
transmitter freq.: 300.131853 MHz  
time domain size: 65536 points  
width: 6172.84 Hz = 20.5671 ppm = 0.094190 Hz/pt  
number of scans: 16

freq. of 0 ppm: 300.129976 MHz  
processed size: 32768 complex points  
LB: 0.300 GF: 0.0000

**Figure S23.**  $^1\text{H}$ -NMR spectrum of **compound#12** ( $\text{D}_2\text{O}$ ).



SpinWorks 4: C13CPD D2O {C:\Bruker\TOPSPIN1.3} Liu 52

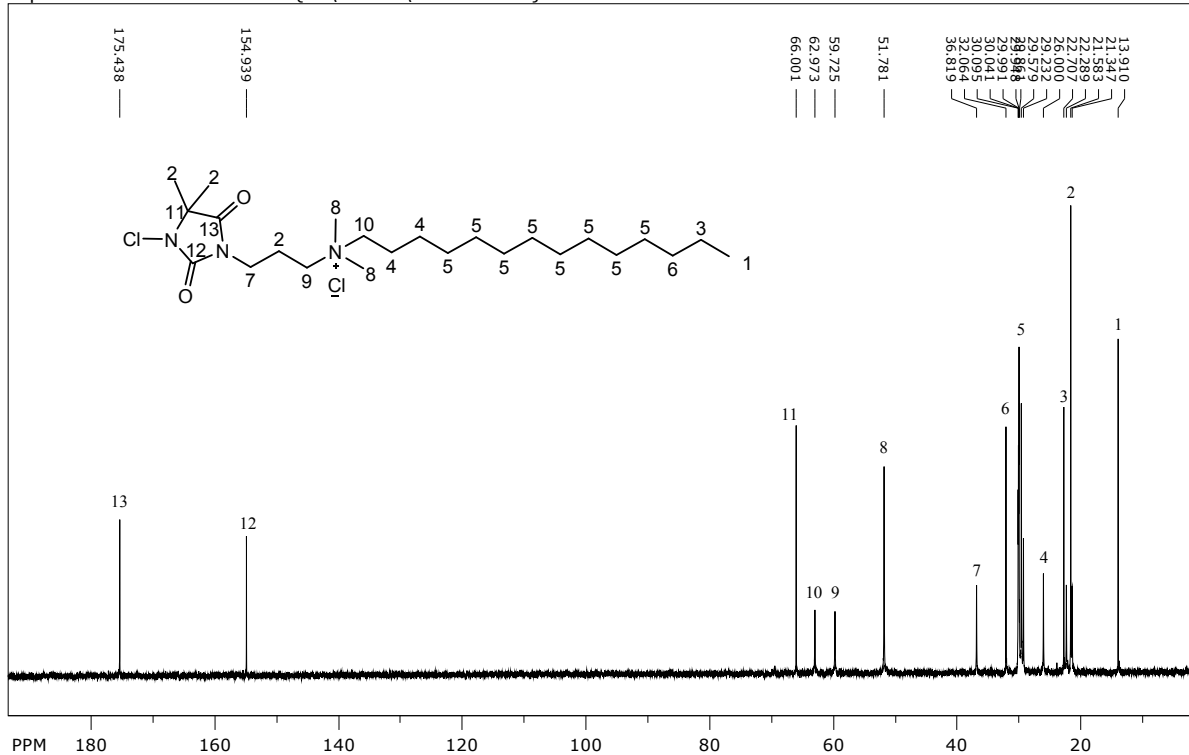

file: ...ha\NMR\Paper NMR\sgH-1-c12ch\1\fid exp: <zgg30>  
transmitter freq.: 75.475295 MHz  
time domain size: 65536 points  
width: 17985.61 Hz = 238.2980 ppm = 0.274439 Hz/pt  
number of scans: 1024

freq. of 0 ppm: 75.467749 MHz  
processed size: 32768 complex points  
LB: 1.000 GF: 0.0000

**Figure S24.**  $^{13}\text{C}$  NMR spectrum of **compound#12** ( $\text{D}_2\text{O}$ ).

## 2. HPLC-MS analysis of compounds # 1-3,7-9

Analytic HPLC was run on a Varian 212 HPLC instrument, equipped with X-Bridge™ BEH C18 2.5µm and Inertsil C8 3.3µm columns and interfaced with Varian 500 MS-Ion trap detector. Eluent system was gradient: acetonitrile: water (5:95, v/v, 0.1% of formic acid), a linear gradient was applied for 20 min, up to an acetonitrile: water ratio of 90:10 (v/v), after which elution with a acetonitrile: water (5:95, v/v) gradient was used. Flow: 0.4 ml min<sup>-1</sup>. Compound #7-8 were analyzed using X-Bridge™ BEH C18 2.5µm and the rest were ran through Inertsil C8 3.3µm column.

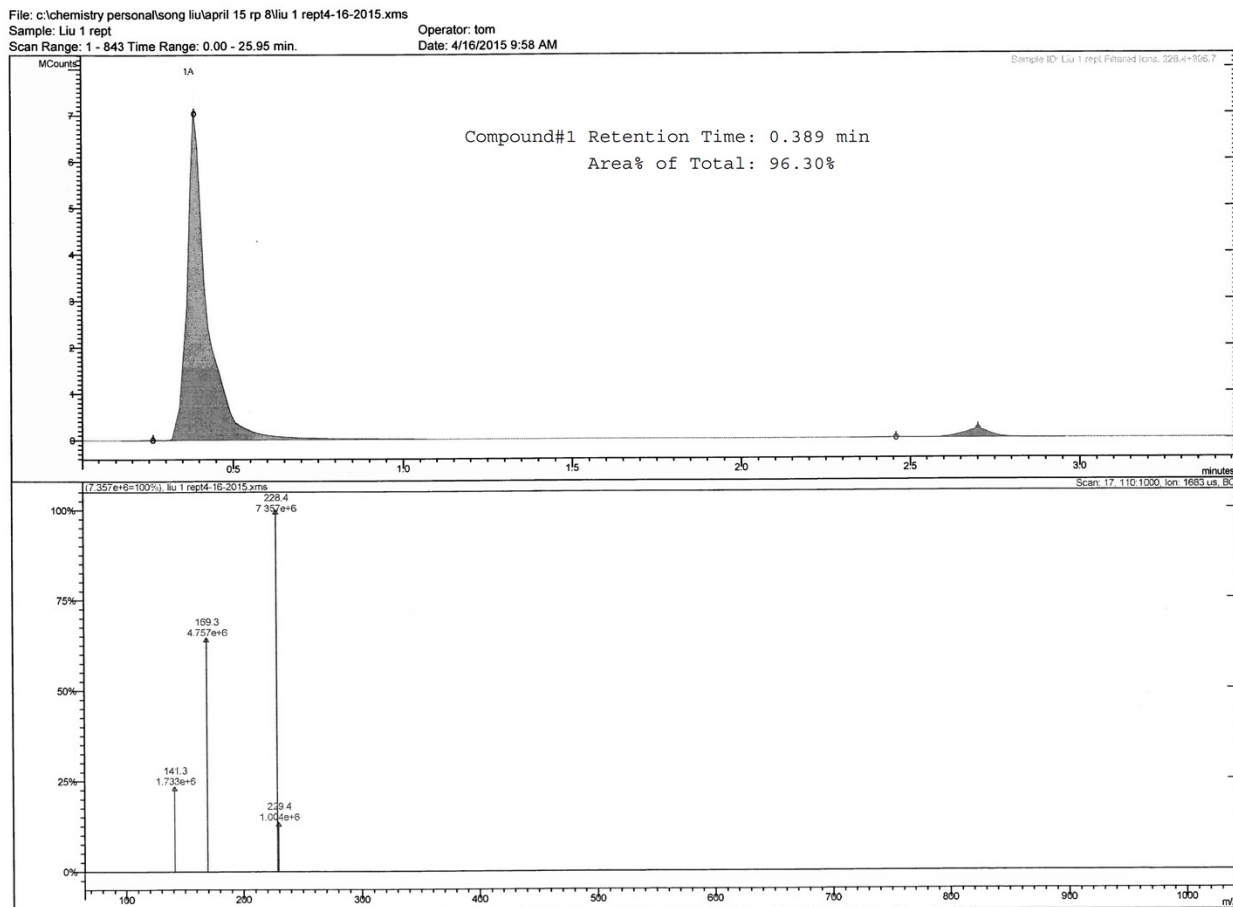

Figure S25. LCMS analysis of compound#1, purity: 96.30%

File: c:\chemistry\personallsong liu\april 15 rp 8\lul 2 .01 to 2 rept4-15-2015.xms  
Sample: Lul 2 .01 to 2 rept Operator: tom  
Scan Range: 1 - 925 Time Range: 0.00 - 25.95 min. Date: 4/15/2015 10:51 AM

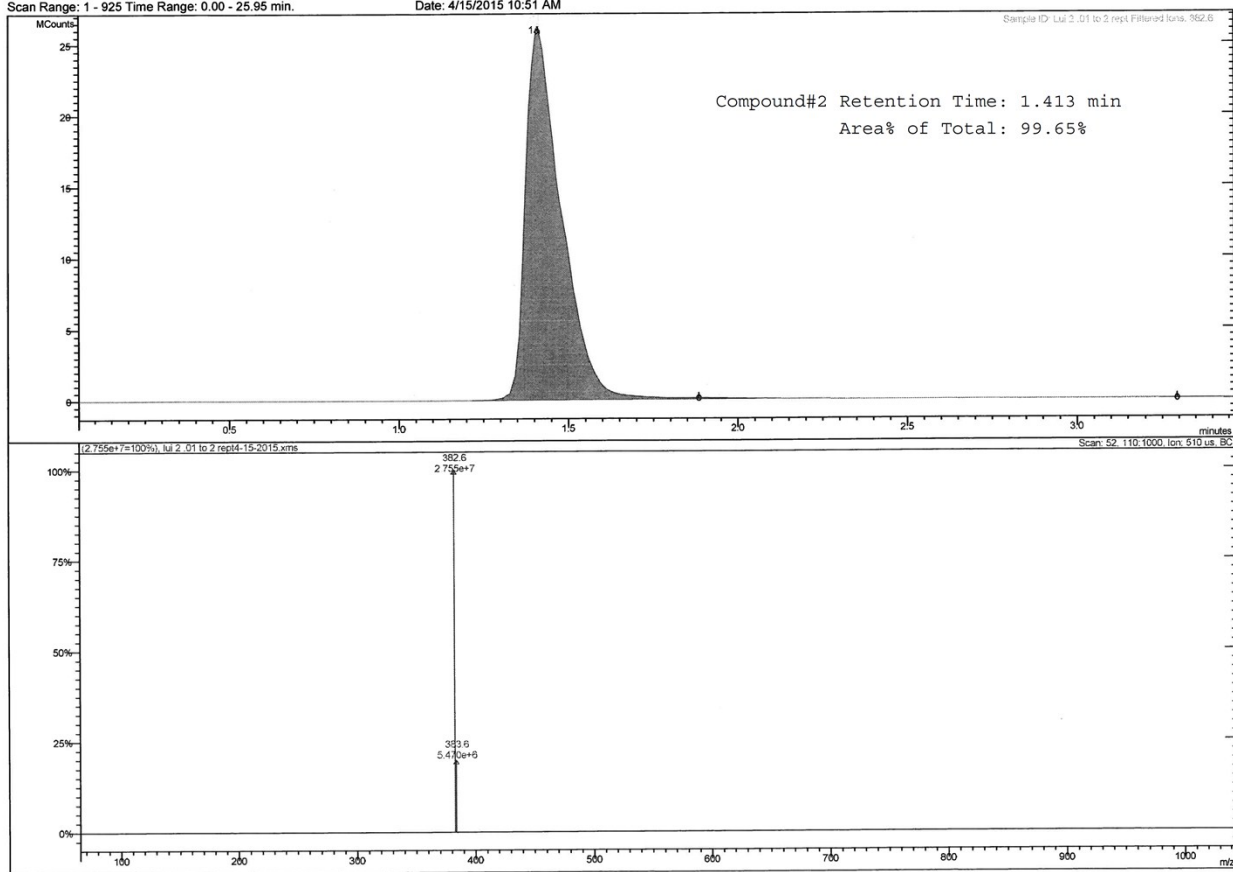

**Figure S26.** LCMS analysis of compound#2, purity: 99.65%.

File: c:\chemistry\personalsong liu\april 15 rp 8\liu 3 .01 to 24-15-2015001.xms  
Sample: Liu 3 .01 to 2 Operator: tom  
Scan Range: 1 - 836 Time Range: 0.00 - 25.96 min. Date: 4/15/2015 11:39 AM

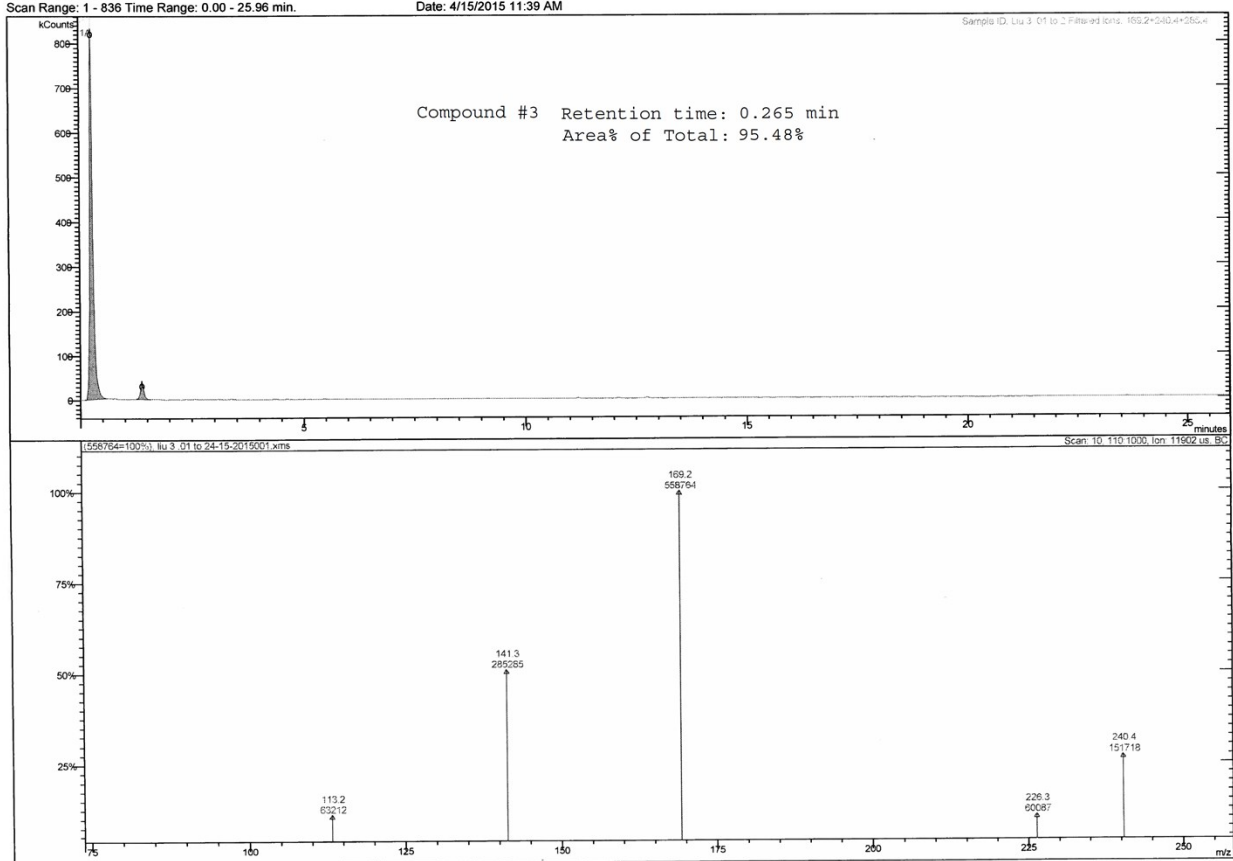

Figure S27. LCMS analysis of compound#3, purity: 95.48%.

File: c:\chemistry\personal\song liu\april 15 rp 8\lul 7 .01 to 24-15-2015.xms  
Sample: Lui 7 .01 to 2 Operator: tom  
Scan Range: 1 - 911 Time Range: 0.00 - 25.93 min. Date: 4/15/2015 12:06 PM

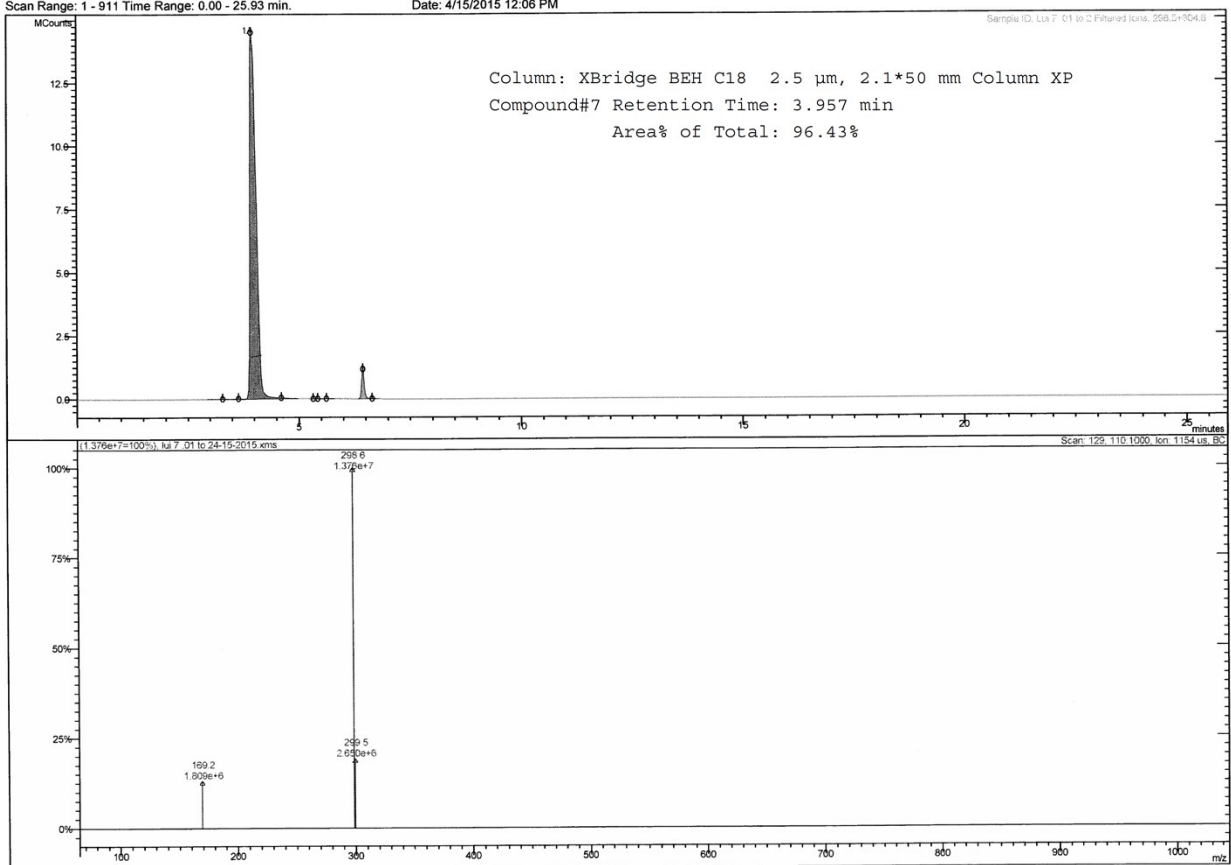

Figure S28. LCMS analysis of compound#7, purity: 96.43%.

File: c:\chemistry\personal\song liu\sam 84-9-2015.xml  
Sample: Sam 8  
Scan Range: 1 - 956 Time Range: 0.00 - 25.96 min.

Operator: tom  
Date: 4/9/2015 11:56 AM

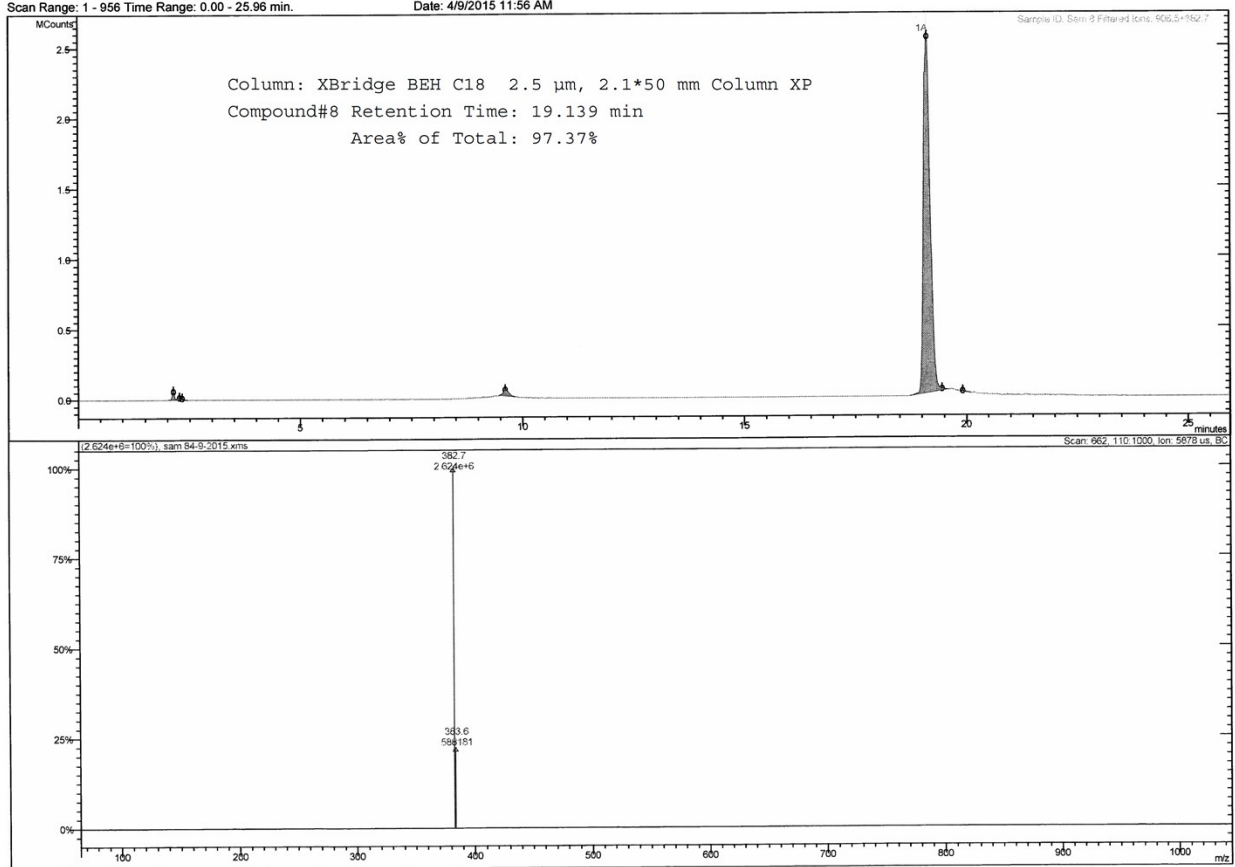

**Figure S29.** LCMS analysis of compound#8, purity: 97.37%.

File: c:\chemistry\personalsong\liu\sam 9 2xdl4-9-2015.xms  
Sample: sam 9 2xdl4  
Scan Range: 1 - 1351 Time Range: 0.00 - 25.97 min.

Operator: tom  
Date: 4/9/2015 4:41 PM

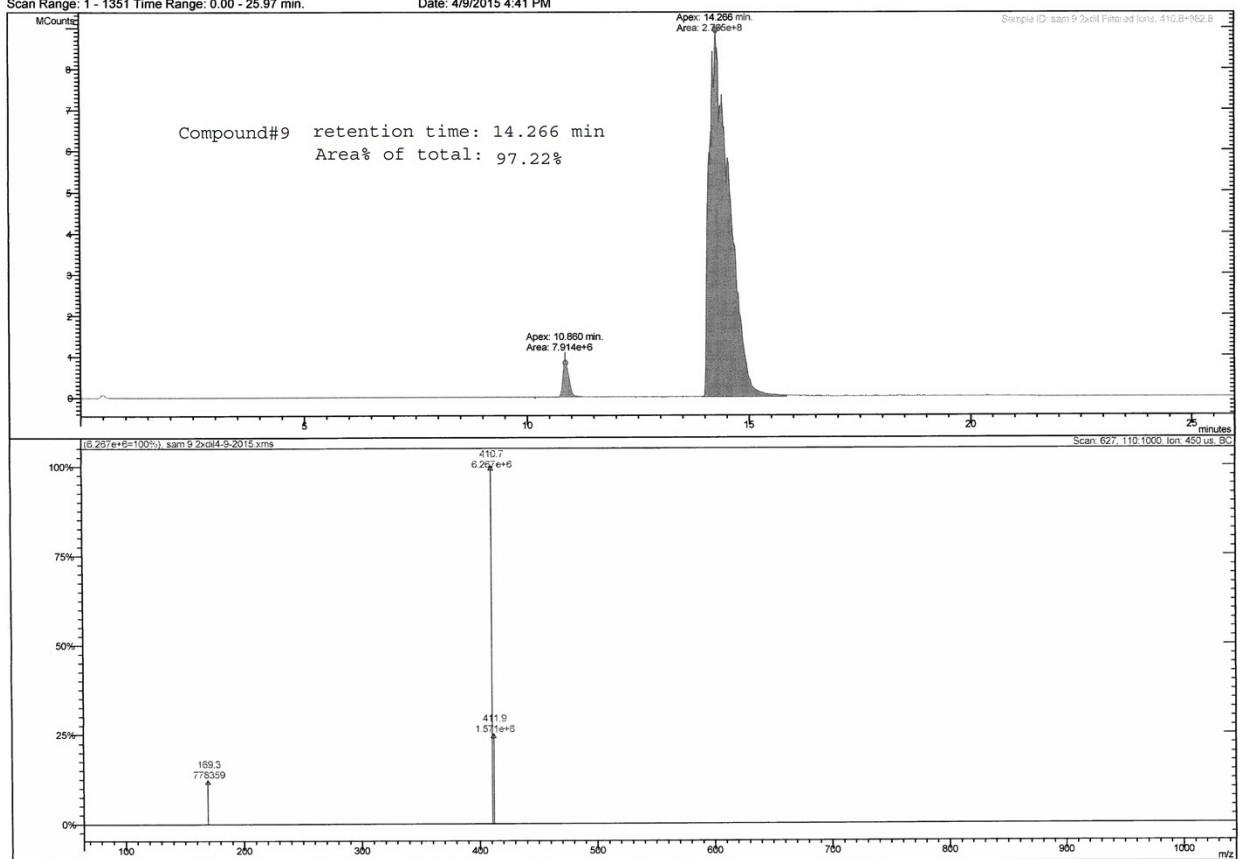

**Figure S30.** LCMS analysis of compound#9, purity: 97.22%.

### 3. Absolute quantitative $^1\text{H}$ NMR (qHNMR) of compounds# 4-6,10-12

SpinWorks 4: PROTON D2O {C:\Bruker\TOPSPIN1.3} Liu 12

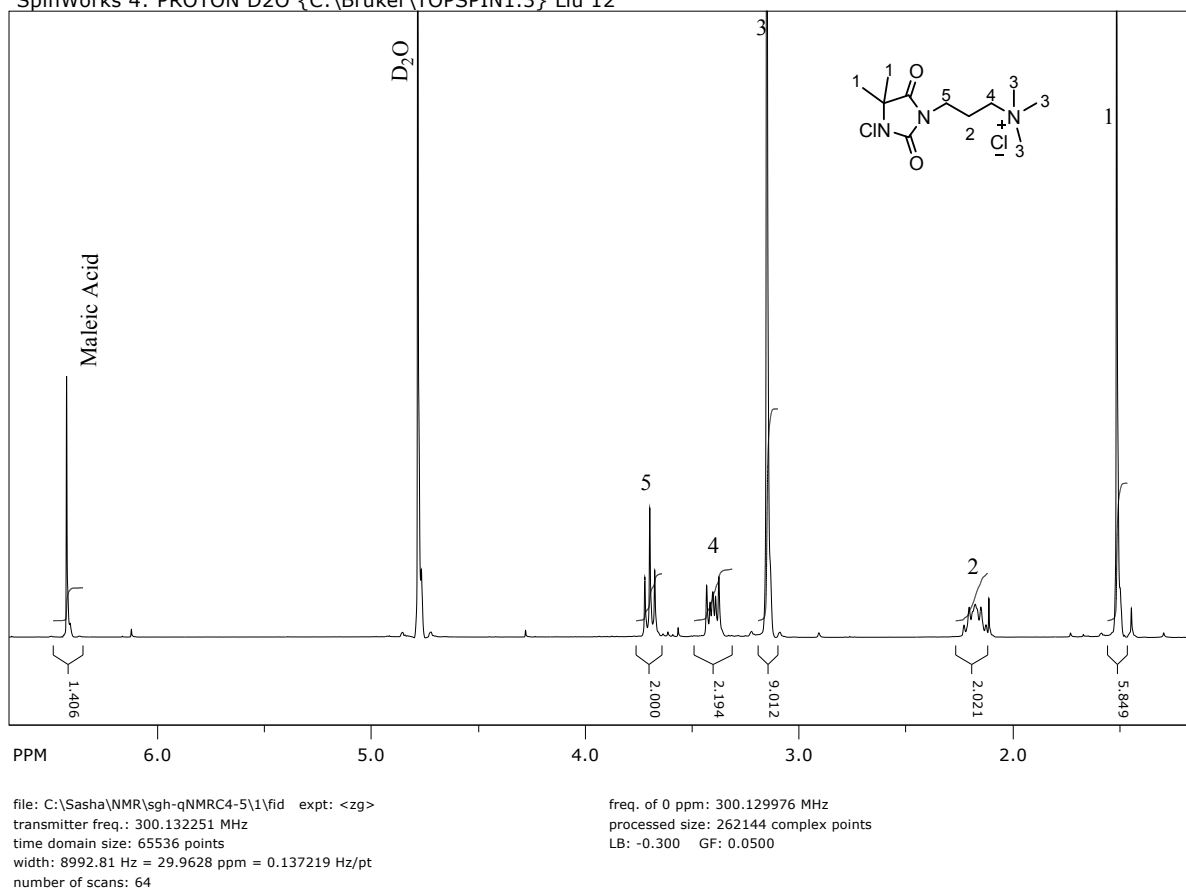

**Figure S31.** Quantitative  $^1\text{H}$  NMR (qHNMR) spectrum of compound#4, purity: 99.30%.



$$P[\%] = \frac{n_{IC} \cdot Int_t \cdot MW_t \cdot m_{IC}}{n_t \cdot Int_{IC} \cdot MW_{IC} \cdot m_s} \cdot P_{IC}$$

$m_s = 4.995$  mg,  $m_{IC} = 1.512$  mg,  $P_{IC} = 99.94$ ,

$Int_t = 17.586$ ,  $n_t = 19$ ,  $Int_{IC} = 1.449$ ,  $n_{IC} = 2$ ,

$MW_t = 298.21$  g/mol,  $MW_{IC} = 116.07$  g/mol

**Table S1.** Absolute quantitative  $^1\text{H}$  NMR (qHNMR) analysis of compound#4 (4.995 mg/0.6 mL) in  $\text{D}_2\text{O}$  with the addition of maleic acid (99.94% pure) as internal calibrant.

|             | Peaks (ppm) | Integration | Number of protons | Weight (mg) | MWt (g/mol) |
|-------------|-------------|-------------|-------------------|-------------|-------------|
| Compound 4  | 1.471-1.549 | 5.388       | 6                 | 4.995       | 298.21      |
|             | 3.108-3.205 | 8.341       | 9                 |             |             |
|             | 3.301-3.472 | 2           | 2                 |             |             |
|             | 3.640-3.785 | 1.857       | 2                 |             |             |
|             | Sum         | 17.586      | 19                |             |             |
| Internal St | 6.285-6.493 | 1.449       | 2                 | 1.512       | 116.07      |

$$P[\%] = \frac{2 * 17.586 * 298.21 * 1.512}{19 * 1.449 * 116.07 * 4.995} * 99.94 = \frac{15858.82}{15961.64} * 99.94 = 99.30 \%$$

SpinWorks 4: PROTON D2O {C:\Bruker\TOPSPIN1.3} Liu 8

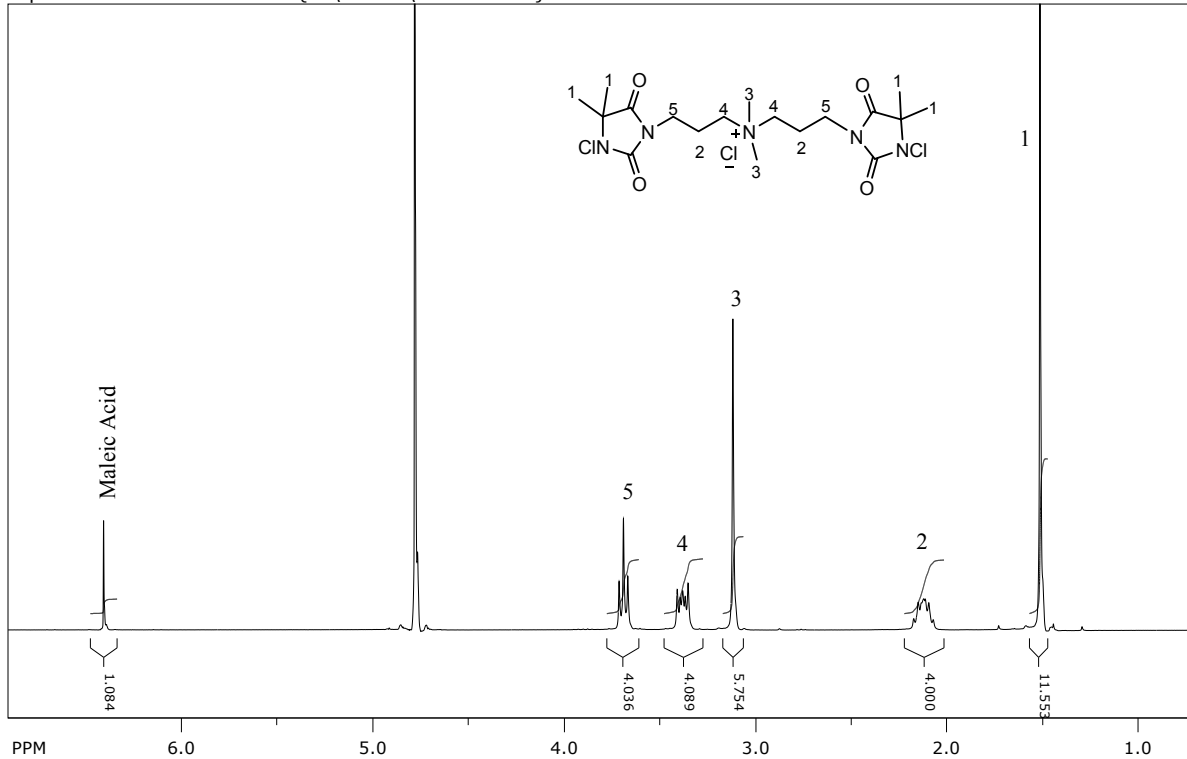

file: C:\Sasha\NMR\SGH-qNMRC5-3\1\fid exp: <zg>  
transmitter freq.: 300.132251 MHz  
time domain size: 65536 points  
width: 8992.81 Hz = 29.9628 ppm = 0.137219 Hz/pt  
number of scans: 64

freq. of 0 ppm: 300.129976 MHz  
processed size: 262144 complex points  
LB: -0.300 GF: 0.0500

**Figure S32.** Quantitative  $^1\text{H}$  NMR (qHNMR) spectrum of compound#5, purity: 96.55%.

$$P[\%] = \frac{n_{IC} \cdot Int_t \cdot MW_t \cdot m_{IC}}{n_t \cdot Int_{IC} \cdot MW_{IC} \cdot m_s} \cdot P_{IC}$$

$m_s = 4.66$  mg,  $m_{IC} = 0.593$  mg,  $P_{IC} = 99.94$ ,

$Int_t = 29.433$ ,  $n_t = 30$ ,  $Int_{IC} = 1.084$ ,  $n_{IC} = 2$ ,

$MW_t = 486.82$  g/mol,  $MW_{IC} = 116.07$  g/mol

**Table S2.** Absolute quantitative  $^1\text{H}$  NMR (qHNMR) analysis of compound#5 (4.66 mg/0.6 mL) in  $\text{D}_2\text{O}$  with the addition of maleic acid (99.94% pure) as internal calibrant.

|             | Peaks (ppm)  | Integration | Number of protons | Weight (mg) | MWt (g/mol) |
|-------------|--------------|-------------|-------------------|-------------|-------------|
| Compound 5  | 1.472-1.567  | 11.553      | 12                | 4.66        | 486.82      |
|             | 2.014-2.221  | 4           | 4                 |             |             |
|             | 3.063-3.171  | 5.755       | 6                 |             |             |
|             | 3.275 -3.478 | 4.089       | 4                 |             |             |
|             | 3.610-3.777  | 4.036       | 4                 |             |             |
|             | Sum          | 29.433      | 30                |             |             |
| Internal St | 6.338-6.478  | 1.084       | 2                 | 0.593       | 116.07      |

$$P[\%] = \frac{2 * 29.433 * 486.82 * 0.593}{30 * 1.084 * 116.07 * 4.66} * 99.94 = \frac{16993.69}{17589.62} * 99.94 = 96.55 \%$$

SpinWorks 4: PROTON D2O {C:\Bruker\TOPSPIN1.3} Liu 9

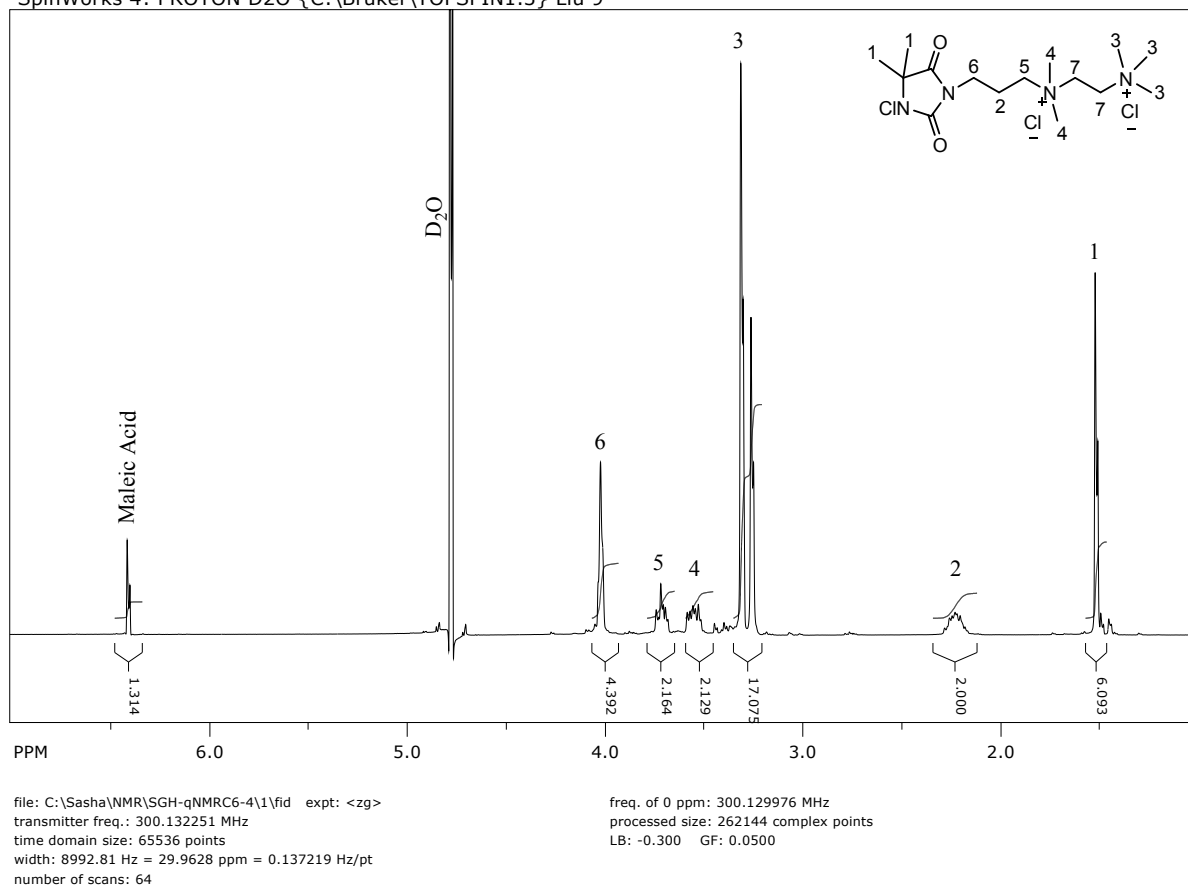

**Figure S33.** Quantitative  $^1\text{H}$  NMR (qHNMR) spectrum of compound#6, purity: 97.02%.

$$P[\%] = \frac{n_{IC} \cdot Int_t \cdot MW_t \cdot m_{IC}}{n_t \cdot Int_{IC} \cdot MW_{IC} \cdot m_s} \cdot P_{IC}$$

$m_s = 6.123$  mg,  $m_{IC} = 1.023$  mg,  $P_{IC} = 99.94$ ,

$Int_t = 33.851$ ,  $n_t = 31$ ,  $Int_{IC} = 1.314$ ,  $n_{IC} = 2$ ,

$MW_t = 405.79$  g/mol,  $MW_{IC} = 116.07$  g/mol

**Table S3.** Absolute quantitative  $^1\text{H}$  NMR (qHNMR) analysis of compound#6 (6.123 mg/0.6 mL) in  $\text{D}_2\text{O}$  with the addition of maleic acid (99.94% pure) as internal calibrant.

|             | Peaks (ppm) | Integration | Number of protons | Weight (mg) | MWt (g/mol) |
|-------------|-------------|-------------|-------------------|-------------|-------------|
| Compound 6  | 1.462-1.569 | 6.09        | 6                 | 6.123       | 405.79      |
|             | 2.118-2.342 | 2           | 2                 |             |             |
|             | 3.207-3.351 | 17.076      | 15                |             |             |
|             | 3.453-3.593 | 2.129       | 2                 |             |             |
|             | 3.649-3.788 | 2.164       | 2                 |             |             |
|             | 3.933-4.067 | 4.392       | 4                 |             |             |
|             | Sum         | 33.851      | 31                |             |             |
| Internal St | 6.342-6.482 | 1.314       | 2                 | 1.023       | 116.07      |

$$P[\%] = \frac{2 * 33.851 * 405.79 * 1.023}{31 * 1.314 * 116.07 * 6.123} * 99.94 = \frac{28104.67}{28949.51} * 99.94 = 97.02 \%$$

SpinWorks 4: PROTON D2O {C:\Bruker\TOPSPIN1.3} Liu 30

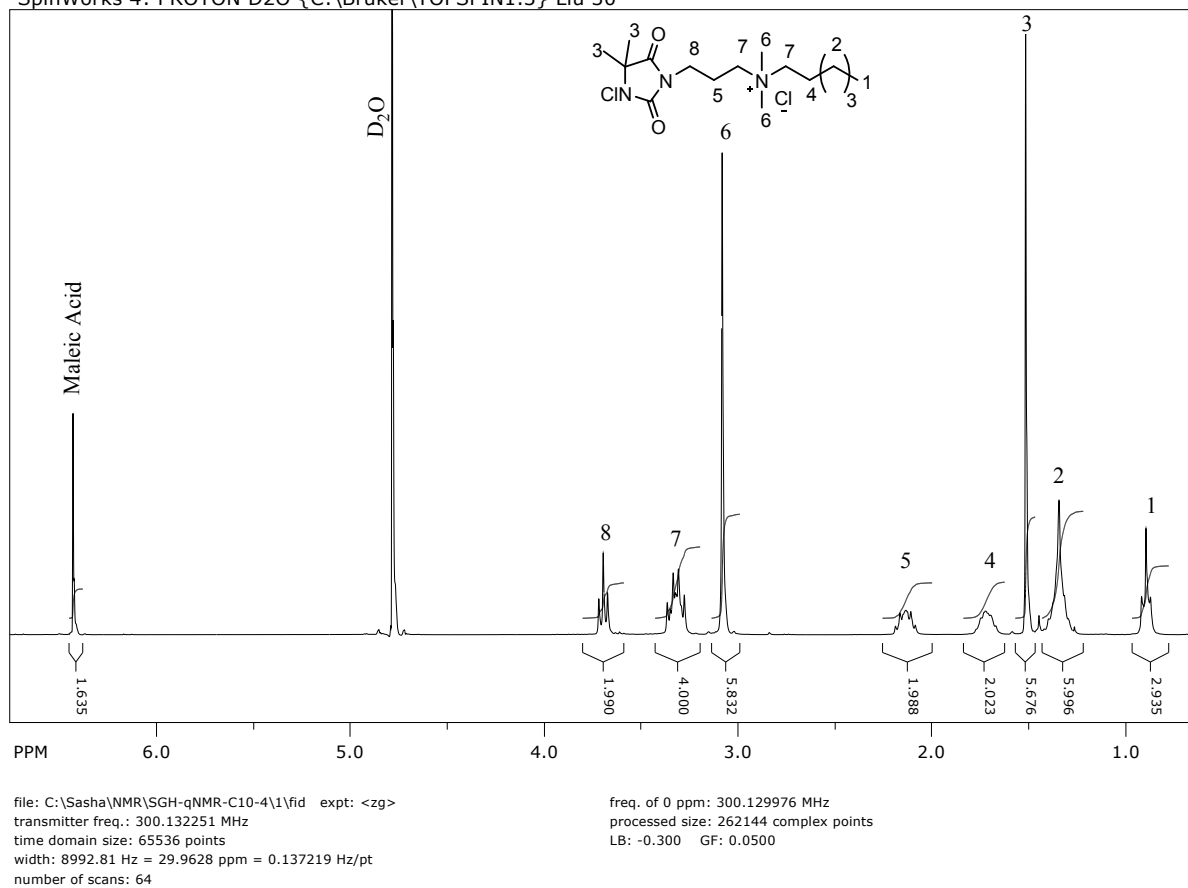

**Figure S34.** Quantitative <sup>1</sup>H NMR (qHNMR) spectrum of compound#10, purity: 95.54%.

$$P[\%] = \frac{n_{IC} \cdot Int_t \cdot MW_t \cdot m_{IC}}{n_t \cdot Int_{IC} \cdot MW_{IC} \cdot m_s} \cdot P_{IC}$$

$m_s = 7.794$  mg,  $m_{IC} = 1.944$  mg,  $P_{IC} = 99.94$ ,

$Int_t = 30.441$ ,  $n_t = 31$ ,  $Int_{IC} = 1.635$ ,  $n_{IC} = 2$ ,

$MW_t = 370.36$  g/mol,  $MW_{IC} = 116.07$  g/mol

**Table S4.** Absolute quantitative  $^1\text{H}$  NMR (qHNMR) analysis of compound#**10** (7.794 mg/0.6 mL) in  $\text{D}_2\text{O}$  with the addition of maleic acid (99.94% pure) as internal calibrant.

|             | Peaks (ppm) | Integration | Number of protons | Weight (mg) | MWt (g/mol) |
|-------------|-------------|-------------|-------------------|-------------|-------------|
| Compound 10 | 0.776-0.965 | 2.935       | 3                 | 7.794       | 370.36      |
|             | 1.217-1.430 | 5.997       | 6                 |             |             |
|             | 1.465-1.568 | 5.676       | 6                 |             |             |
|             | 1.623-1.836 | 2.023       | 2                 |             |             |
|             | 1.997-2.253 | 1.988       | 2                 |             |             |
|             | 2.990-3.136 | 5.832       | 6                 |             |             |
|             | 3.195-3.427 | 4           | 4                 |             |             |
|             | 3.589-3.801 | 1.99        | 2                 |             |             |
|             | Sum         | 30.441      | 31                |             |             |
| Internal St | 6.382-6.453 | 1.635       | 2                 | 1.944       | 116.07      |

$$P[\%] = \frac{2 * 30.441 * 370.36 * 1.944}{31 * 1.635 * 116.07 * 7.794} * 99.94 = \frac{43833.81}{45852.16} * 99.94 = 95.54 \%$$

SpinWorks 4: PROTON D2O {C:\Bruker\TOPSPIN1.3} Liu 31

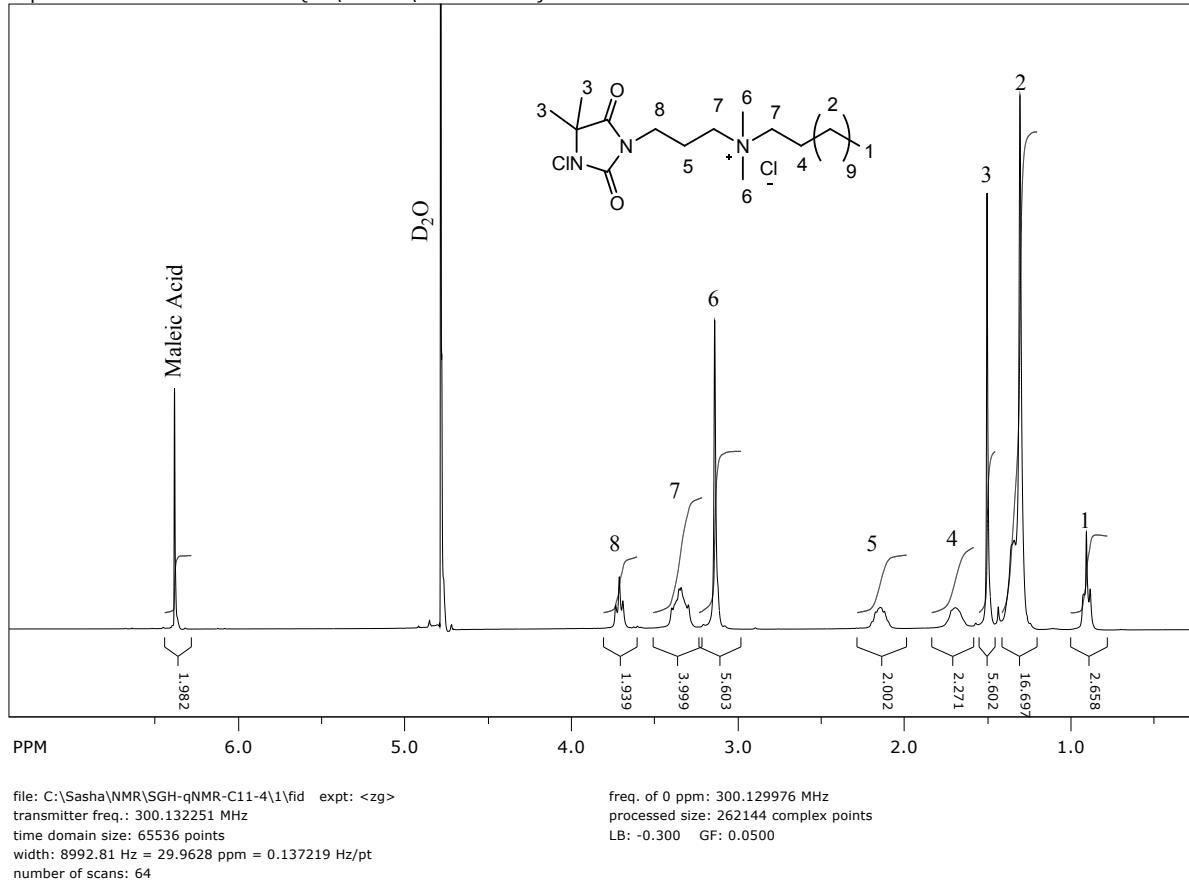

**Figure S35.** Quantitative  $^1\text{H}$  NMR (qHNMR) spectrum of compound#11, purity: 95.76%.



$$P[\%] = \frac{n_{IC} \cdot Int_t \cdot MW_t \cdot m_{IC}}{n_t \cdot Int_{IC} \cdot MW_{IC} \cdot m_s} \cdot P_{IC}$$

$m_s = 7.498$  mg,  $m_{IC} = 1.926$  mg,  $P_{IC} = 99.94$ ,

$Int_t = 40.773$ ,  $n_t = 43$ ,  $Int_{IC} = 1.982$ ,  $n_{IC} = 2$ ,

$MW_t = 452.5$  g/mol,  $MW_{IC} = 116.07$  g/mol

**Table S5.** Absolute quantitative  $^1\text{H}$  NMR (qHNMR) analysis of compound#11 (7.498 mg/0.6 mL) in  $\text{D}_2\text{O}$  with the addition of maleic acid (99.94% pure) as internal calibrant.

|             | Peaks (ppm) | Integration | Number of protons | Weight (mg) | MWt (g/mol) |
|-------------|-------------|-------------|-------------------|-------------|-------------|
| Compound 11 | 0.779-0.999 | 2.658       | 3                 | 7.498       | 452.5       |
|             | 1.201-1.412 | 16.697      | 18                |             |             |
|             | 1.453-1.55  | 5.602       | 6                 |             |             |
|             | 1.582-1.834 | 2.272       | 2                 |             |             |
|             | 1.986-2.284 | 2.002       | 2                 |             |             |
|             | 2.981-3.233 | 5.603       | 6                 |             |             |
|             | 3.215-3.509 | 4           | 4                 |             |             |
|             | 3.605-3.807 | 1.939       | 2                 |             |             |
|             | Sum         | 40.773      | 43                |             |             |
| Internal St | 6.284-6.445 | 1.982       | 2                 | 1.926       | 116.07      |

$$P[\%] = \frac{2 * 40.773 * 452.5 * 1.926}{43 * 1.982 * 116.07 * 7.498} * 99.94 = \frac{71068.56}{74171.58} * 99.94 = 95.76 \%$$



$$P[\%] = \frac{n_{IC} \cdot Int_t \cdot MW_t \cdot m_{IC}}{n_t \cdot Int_{IC} \cdot MW_{IC} \cdot m_s} \cdot P_{IC}$$

$m_s = 8.887$  mg,  $m_{IC} = 2.803$  mg,  $P_{IC} = 99.94$ ,

$Int_t = 46.572$ ,  $n_t = 47$ ,  $Int_{IC} = 2.704$ ,  $n_{IC} = 2$ ,

$MW_t = 480.55$  g/mol,  $MW_{IC} = 116.07$  g/mol

**Table S6.** Absolute quantitative  $^1\text{H}$  NMR (qHNMR) analysis of compound#12 (8.887 mg/0.6 mL) in  $\text{D}_2\text{O}$  with the addition of maleic acid (99.94% pure) as internal calibrant.

|             | Peaks (ppm) | Integration | Number of protons | Weigh (mg) | MWt (g/mol) |
|-------------|-------------|-------------|-------------------|------------|-------------|
| Compound 12 | 0.801-1.01  | 2.8         | 3                 | 8.887      | 480.55      |
|             | 1.17-1.407  | 21.65       | 22                |            |             |
|             | 1.44-1.549  | 6.051       | 6                 |            |             |
|             | 1.586-1.818 | 2.393       | 2                 |            |             |
|             | 2.035-2.286 | 2.059       | 2                 |            |             |
|             | 3.052-3.236 | 5.696       | 6                 |            |             |
|             | 3.255-3.515 | 4           | 4                 |            |             |
|             | 3.629-3.856 | 1.923       | 2                 |            |             |
|             | Sum         | 46.572      | 47                |            |             |
| Internal St | 6.319-6.437 | 2.704       | 2                 | 2.803      | 116.07      |

$$P[\%] = \frac{2 * 46.572 * 480.55 * 2.803}{47 * 2.704 * 116.07 * 8.887} * 99.94 = \frac{125463.26}{131093.06} * 99.94 = 95.65 \%$$

1H-NMR Spectrum (600 MHz, Maleic acid in D<sub>2</sub>O)

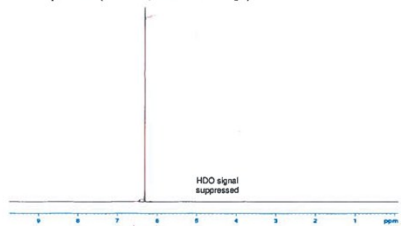

REFERENCES

ISO Guide 31, 2<sup>nd</sup> Ed. (2000), "Reference materials - Contents of certificates and labels"  
 Eurachem/CITAC Guide, 1<sup>st</sup> Ed. (2003), "Traceability in chemical measurement"  
 ISO Guide 35, 3<sup>rd</sup> Ed. (2005), "Reference materials - General and statistical principles for certification"  
 Eurachem/CITAC Guide, 3<sup>rd</sup> Ed. (2012), "Quantifying uncertainty in analytical measurement"  
 ISO/IEC 17025, 2<sup>nd</sup> Ed. (2005), "General requirements for the competence of testing and calibration laboratories"  
 ISO Guide 34, 3<sup>rd</sup> Ed. (2009), "General requirements for the competence of reference material producers"

**TraceCERT**<sup>®</sup>  
 Traceable Certified Reference Materials

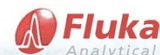

Certificate

Produced in double accredited laboratory fulfilling ISO/IEC 17025 and ISO Guide 34

This certificate is designed in accordance with ISO Guide 31<sup>[1]</sup>.

Product name: **Maleic acid**  
 Product no.: **92816**  
 Lot no.: **BCBM8127V**  
 Formula: **C<sub>4</sub>H<sub>4</sub>O<sub>4</sub>**  
 Molecular mass: **116.07**  
 Traceability<sup>[2]</sup>: **NIST SRM 841 (KHP) and NIST SRM 350b (Benzoic acid)**  
 Certificate issue date: **April 16, 2014**  
 Expiry: **MAR 2018**

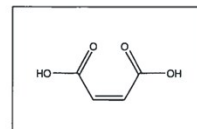

| Certified value and uncertainty according to ISO Guide 35 <sup>[3]</sup> and Eurachem/CITAC Guide <sup>[4]</sup> |                                        |                                                                            |
|------------------------------------------------------------------------------------------------------------------|----------------------------------------|----------------------------------------------------------------------------|
| Substance                                                                                                        | Certified value as mass fraction (g/g) | Expanded uncertainty, $U = k \cdot u_c$ ( $k = 2$ ) as mass fraction (g/g) |
| <b>Maleic acid</b>                                                                                               | <b>99.94 %</b>                         | <b>0.16 %</b>                                                              |

Minimum sample: The sample is solid at room-temperature. 20 mg is recommended as the minimal sample amount. If less material is used, it is recommended to increase the certified uncertainty by a factor of two for half of sample and a factor of four for a quarter of sample.  
 Drying instruction: This material does not require drying before use.  
 Intended use: This CRM shall be used as internal standard for quantitative <sup>1</sup>H-NMR measurements.  
 Storage and handling: The CRM should be stored in the original bottle at room-temperature (20-25 °C). After use the bottle should be tightly closed and protected from excessive moisture and light. Storage under Argon is recommended.

CRM operations: *A. Rück*  
 A. Rück, Ph.D.  
 Certification body: *K.-D. Schmidt, Ph.D.*  
 K.-D. Schmidt, Ph.D.

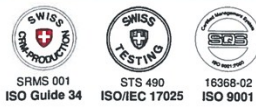

Figure S37. Certificate of the internal calibrant maleic acid.

**Table S7.** Comparison of the antibacterial activity of tetradecyl # 9 and 12 with Benzylododecyldimethylammonium bromide (C12) and Benzyltetradecyldimethylammonium chloride(C14) against 10<sup>7</sup> CFU/mL of MRSA and 10<sup>6</sup> CFU/mL MDR *P. aeruginosa*.

| <b>Gram-positive MRSA (10<sup>7</sup> CFU/mL)***</b>                     |                   |                                                   |              |              |              |              |              |              |
|--------------------------------------------------------------------------|-------------------|---------------------------------------------------|--------------|--------------|--------------|--------------|--------------|--------------|
| Synthetic compounds*                                                     |                   | Bacterial Reduction at Various Contact Time (min) |              |              |              |              |              |              |
|                                                                          |                   | <b>1</b>                                          | <b>3</b>     | <b>5</b>     | <b>10</b>    | <b>20</b>    | <b>30</b>    | <b>60</b>    |
| <b>9</b>                                                                 | %                 | 94.23 ± 0.00                                      | 100.0 ± 0.00 | 100.0 ± 0.00 | 100.0 ± 0.00 | 100.0 ± 0.00 | 100.0 ± 0.00 | 100.0 ± 0.00 |
|                                                                          | Log <sub>10</sub> | 1.24 ± 0.00                                       | 7.21 ± 0.09  | 7.21 ± 0.09  | 7.21 ± 0.09  | 7.21 ± 0.09  | 7.21 ± 0.09  | 7.21 ± 0.09  |
| <b>12</b>                                                                | %                 | 100.0 ± 0.00                                      | 100.0 ± 0.00 | 100.0 ± 0.00 | 100.0 ± 0.00 | 100.0 ± 0.00 | 100.0 ± 0.00 | 100.0 ± 0.00 |
|                                                                          | Log <sub>10</sub> | 7.21 ± 0.09                                       | 7.21 ± 0.09  | 7.21 ± 0.09  | 7.21 ± 0.09  | 7.21 ± 0.09  | 7.21 ± 0.09  | 7.21 ± 0.09  |
| <b>C12</b>                                                               | %                 | 37.40 ± 52                                        | 58.96 ± 25   | 81.54 ± 16   | 99.64 ± 0.42 | 100.0 ± 0.00 | 100.0 ± 0.00 | 100.0 ± 0.00 |
|                                                                          | Log <sub>10</sub> | 0.300 ± 0.42                                      | 0.430 ± 0.28 | 0.840 ± 0.45 | 2.69 ± 0.72  | 7.21 ± 0.09  | 7.21 ± 0.09  | 7.21 ± 0.09  |
| <b>C14</b>                                                               | %                 | 100.0 ± 0.00                                      | 100.0 ± 0.00 | 100.0 ± 0.00 | 100.0 ± 0.00 | 100.0 ± 0.00 | 100.0 ± 0.00 | 100.0 ± 0.00 |
|                                                                          | Log <sub>10</sub> | 7.21 ± 0.09                                       | 7.21 ± 0.09  | 7.21 ± 0.09  | 7.21 ± 0.09  | 7.21 ± 0.09  | 7.21 ± 0.09  | 7.21 ± 0.09  |
| <b>Gram-negative MDR <i>P. aeruginosa</i> (10<sup>6</sup> CFU/mL)***</b> |                   |                                                   |              |              |              |              |              |              |
|                                                                          |                   | <b>1</b>                                          | <b>3</b>     | <b>5</b>     | <b>10</b>    | <b>20</b>    | <b>30</b>    | <b>60</b>    |
| <b>9</b>                                                                 | %                 | 85.60 ± 18.2                                      | 99.98 ± 0.03 | 100.0 ± 0.00 | 100.0 ± 0.00 | 100.0 ± 0.00 | 100.0 ± 0.00 | 100.0 ± 0.00 |
|                                                                          | Log <sub>10</sub> | 1.18 ± 0.88                                       | 4.73 ± 1.8   | 6.36 ± 0.45  | 6.36 ± 0.45  | 6.36 ± 0.45  | 6.36 ± 0.45  | 6.36 ± 0.45  |
| <b>12</b>                                                                | %                 | 98.94 ± 1.5                                       | 99.99 ± 0.01 | 100.0 ± 0.00 | 100.0 ± 0.00 | 100.0 ± 0.00 | 100.0 ± 0.00 | 100.0 ± 0.00 |
|                                                                          | Log <sub>10</sub> | 3.85 ± 3.1                                        | 4.91 ± 1.6   | 6.36 ± 0.45  | 6.36 ± 0.45  | 6.36 ± 0.45  | 6.36 ± 0.45  | 6.36 ± 0.45  |
| <b>C12</b>                                                               | %                 | 97.09 ± 0.00                                      | 98.99 ± 1.4  | 99.44 ± 0.79 | 100.0 ± 0.00 | 100.0 ± 0.00 | 100.0 ± 0.00 | 100.0 ± 0.00 |
|                                                                          | Log <sub>10</sub> | 1.54 ± 0.00                                       | 2.8 ± 1.5    | 2.25 ± 0.04  | 6.36 ± 0.45  | 6.36 ± 0.45  | 6.36 ± 0.45  | 6.36 ± 0.45  |
| <b>C14</b>                                                               | %                 | 100.0 ± 0.00                                      | 100.0 ± 0.00 | 100.0 ± 0.00 | 100.0 ± 0.00 | 100.0 ± 0.00 | 100.0 ± 0.00 | 100.0 ± 0.00 |
|                                                                          | Log <sub>10</sub> | 6.36 ± 0.45                                       | 6.36 ± 0.45  | 6.36 ± 0.45  | 6.36 ± 0.45  | 6.36 ± 0.45  | 6.36 ± 0.45  | 6.36 ± 0.45  |

\*. Concentration of the compounds was set at 0.141 mM
